# Supplementary material for: From somatic variants towards precision oncology: Evidence-driven reporting of treatment options in molecular tumor boards
Source: PubMed Central journal article supplement (PMC5856211; doi:10.1186/s13073-018-0529-2), 2018-03-15
Supplement: 13073_2018_529_MOESM5_ESM.pdf [file 13073_2018_529_MOESM5_ESM.pdf]

# MTB Report - From somatic variants to treatment options

Department of Medical Statistics, University Medical Center Goettingen

September 27, 2017

## PATIENT INFORMATION

|                             |                                                                                                    |                          |      |
|-----------------------------|----------------------------------------------------------------------------------------------------|--------------------------|------|
| <b>Patient ID</b>           | MASTER-01                                                                                          | <b>Tissue Type</b>       | ?    |
| <b>Gender</b>               | Male                                                                                               | <b>Tumor Content (%)</b> | 35   |
| <b>Disease</b>              | Breast carcinoma metastasis                                                                        | <b>Number SNVs</b>       | 104  |
| <b>Previous Therapies</b>   | -                                                                                                  | <b>Number CNVs</b>       | 3045 |
| <b>Tumor Board Decision</b> | BRCA1/2 deletions: PARP-Inhibitors (Olaparib, Melfalon); RAF1 and PDGFRA amplifications: sorafenib | <b>Number Fusions</b>    | 5    |

## GENE-DRUG PREDICTIVE ASSOCIATIONS

**Method:** Somatic variants of the patient (mutations, amplifications, deletions, rearrangements) are searched in curated databases of predictive biomarkers (GKDB<sup>1</sup>, CIViC<sup>2</sup>) and reported according to their clinical evidence (see Levels of Evidence). In the following two tables (SNVs and CNVs), basic information of the somatic variants with relevant clinical implications can be found:

| Gene | Patient's Variant | Level of Evidence | Variant Freq. | Zygoty | Quality (Phred) |
|------|-------------------|-------------------|---------------|--------|-----------------|
| TP53 | I162N             | A2 ,B2 ,B3        | 0.42          | het    | 225             |

| Gene   | Patient's Variant | Level of Evidence | Seg. Mean | Size (Mb) |
|--------|-------------------|-------------------|-----------|-----------|
| AURKA  | ampl.             | B3                | 0.55      | 13.9      |
| BIRC7  | ampl.             | B3                | 0.55      | 13.9      |
| BRCA2  | del.              | A2 ,B2 ,B3        | -1.17     | 0.1       |
| KIT    | ampl.             | B2                | 0.55      | 18.3      |
| MCL1   | ampl.             | B3                | 0.52      | 31.4      |
| MDM4   | ampl.             | B3                | 0.50      | 23.3      |
| MYC    | ampl.             | B3                | 0.67      | 16.4      |
| PDGFRA | ampl.             | B3                | 0.55      | 18.3      |
| RAF1   | ampl.             | B2                | 0.56      | 16.0      |
| RB1    | del.              | A3 ,B3            | -0.56     | 0.3       |
| TOP1   | ampl.             | B2                | 0.69      | 14.7      |

**Levels of Evidence:** Findings are classified into 6 levels of evidence combining the axis A-B and the axis 1-2-3. Level A means evidence in the same cancer type. Level B means evidence in any other cancer type. On the 1-2-3 axis, level 1 means evidence supported by drug approval organizations or clinical guidelines, level 2 contains clinical evidence (clinical trials, case reports) and level 3 consists of preclinical evidence. The distribution of findings into levels is summarized in the right figure

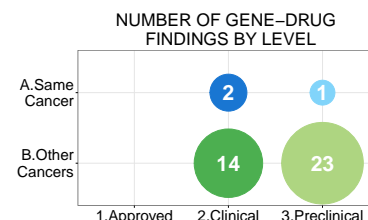

**Table of Results:** All the predictive associations are detailed in this table. The results are sorted by 1) drug frequency, 2) levels of evidence (A1-B1-A2-B2-A3-B3). To allow a quick interpretation, the type of association (response, resistance) is colored (green, red) and new variants are gray and underlined.

| Patient | Gene-Drug |               | Associations  |                            | Evidence                         | PMID         | Level                 |    |
|---------|-----------|---------------|---------------|----------------------------|----------------------------------|--------------|-----------------------|----|
| Gene    | Variant   | Disease       | Known Variant | Association                | Drugs                            |              |                       |    |
| AURKA   | ampl.     | unspecified   | ampl. (GoF)   | sensitivity                | AURK inhibitors                  | preclinical  | 22302096              | B3 |
|         |           | prostate      | ampl. (GoF)   | sensitivity                | AURK inhibitors                  | preclinical  | 22389870              | B3 |
| MYC     | ampl.     | myeloma       | ampl. (GoF)   | sensitivity                | BET inhibitors                   | preclinical  | 21889194              | B3 |
|         |           | neuroblastoma | ampl. (GoF)   | sensitivity                | BET inhibitors                   | preclinical  | 23430699              | B3 |
| RAF1    | ampl.     | melanoma      | ampl.         | sensitivity                | Paclitaxel,Sorafenib,Carboplatin | clin. trials | 26307133              | B2 |
| TP53    | I162N     | ovarian       | any (GoF)     | response                   | WEE1 inhibitors + carboplatin    | early trials | ASCO2015 (abstr 2507) | B2 |
|         |           |               | mut. (LoF)    | resistance                 | cisplatin                        | early trials | 27646943              | B2 |
| BIRC7   | ampl.     | colorectal    | ampl.         | resistance or non-response | Cisplatin                        | preclinical  | 23188704              | B3 |
| TP53    | I162N     | AML           | mut. (LoF)    | response                   | decitabine                       | early trials | 27959731              | B2 |
|         |           | MDS           | mut. (LoF)    | response                   | decitabine                       | early trials | 27959731              | B2 |
|         |           | lung          | mut.          | resistance or non-response | Docetaxel                        | preclinical  | 22425996              | B3 |
|         |           | lung          | mut.          | sensitivity                | Docetaxel,Selumetinib (AZD6244)  | preclinical  | 22425996              | B3 |
| KIT     | ampl.     | melanoma      | ampl.         | resistance or non-response | Imatinib                         | clin. trials | 23775962              | B2 |

<sup>1</sup>Dienstmann et al., Cancer Discov (2015), v19

<sup>2</sup>Griffith et al., Nat Genet (2017), version 01 June 2017

| Patient       |                | Gene-Drug               |                         |                               | Associations                                            |                             |                       |          |
|---------------|----------------|-------------------------|-------------------------|-------------------------------|---------------------------------------------------------|-----------------------------|-----------------------|----------|
| Gene          | Variant        | Disease                 | Known Variant           | Association                   | Drugs                                                   | Evidence                    | PMID                  | Level    |
| MDM4<br>RB1   | ampl.<br>del.  | melanoma                | ampl. (GoF)             | no response                   | imatinib                                                | early trials                | 23775962              | B2       |
|               |                | angiosarcoma            | ampl. (GoF)             | sensitivity                   | MDM2/MDMX inhibitors                                    | preclinical                 | 24336067              | B3       |
|               |                | retinoblastoma          | any (LoF)               | sensitivity                   | MDM2/MDMX inhibitors                                    | preclinical                 | 17080083,<br>21515735 | B3       |
| BRCA2<br>TP53 | del.<br>I162N  | bladder                 | (LoF)                   | sensitivity                   | Mitomycin C                                             | preclinical                 | 16243825              | B3       |
|               |                |                         | mut. (LoF)              | sensitivity                   | mitomycin C, gemcitabine,<br>doxorubicin                | preclinical                 | 27397505              | B3       |
| BRCA2         | del.           | ovarian                 | (LoF), mut.             | sensitivity                   | Olaparib                                                | clin. trials                | 23346317,2186240      | B2       |
| RB1           | del.           | prostate                | (LoF)                   | sensitivity                   | Olaparib                                                | clin. trials                | 26510020              | B2       |
|               |                | breast                  | (LoF)                   | resistance or<br>non-response | Palbociclib (PD0332991)                                 | preclinical                 | 20473330              | A3       |
| BRCA2         | del.           | glioblastoma            | (LoF)                   | resistance or<br>non-response | Palbociclib (PD0332991)                                 | preclinical                 | 20354191              | B3       |
|               |                | breast                  | (LoF)                   | sensitivity                   | Talazoparib                                             | clin. trials                | 28242752              | A2       |
| TP53          | I162N          | ovarian                 | (LoF)                   | sensitivity                   | Talazoparib                                             | clin. trials                | 28242752              | B2       |
|               |                | head and neck<br>breast | any (LoF)<br>mut. (LoF) | sensitivity<br>resistance     | WEE1 inhibitors<br>CDK4/CDK6 inhibitor abe-<br>maciclib | preclinical<br>early trials | 25125259<br>27217383  | B3<br>A2 |
| MCL1<br>TP53  | ampl.<br>I162N | unspecified             | ampl. (GoF)             | resistance                    | anti-tubulin agents                                     | preclinical                 | 21368834              | B3       |
|               |                | CLL                     | mut.                    | sensitivity                   | Alemtuzumab                                             | clin. trials                | 14726385              | B2       |
| MYC<br>TP53   | ampl.<br>I162N | neuroblastoma           | ampl. (GoF)             | sensitivity                   | CDK7 inhibitors                                         | preclinical                 | 25416950              | B3       |
|               |                | gastric                 | mut.                    | sensitivity                   | Chemotherapy                                            | clin. trials                | 24740294              | B2       |
| MYC           | ampl.          | neuroblastoma           | ampl. (GoF)             | sensitivity                   | FACT inhibitor                                          | preclinical                 | 26537256              | B3       |
| RB1           | del.           | retinoblastoma          | any (LoF)               | sensitivity                   | HDAC inhibitors                                         | preclinical                 | 18483379              | B3       |
| TP53          | I162N          | unspecified             | R248Q, R175H<br>(GoF)   | sensitivity                   | HSP90 inhibitors                                        | preclinical                 | 26009011              | B3       |
| TOP1          | ampl.          | colorectal              | ampl., expres-<br>sion  | sensitivity                   | Irinotecan                                              | clin. trials                | 24256029,19775480     | B2       |
| BRCA2         | del.           | ovarian                 | del. (LoF)              | sensitivity                   | PARP inhibitors                                         | preclinical                 | 22392482              | B3       |
| PDGFRA        | ampl.          | glioblastoma            | ampl. (GoF)             | no sensitivity                | PDGFR inhibitors                                        | preclinical                 | 23544171              | B3       |
| MYC           | ampl.          | prostate                | ampl. (GoF)             | sensitivity                   | PIM inhibitors                                          | preclinical                 | 25505253              | B3       |
| TP53          | I162N          | thymic lym-<br>phoma    | any (LoF)               | sensitivity                   | pramlintide                                             | preclinical                 | 25409149              | B3       |
| KIT           | ampl.          | melanoma                | ampl. (GoF)             | no response                   | sunitinib                                               | early trials                | 22261812              | B2       |
| MYC           | ampl.          | colorectal              | ampl. (GoF)             | sensitivity                   | temozolomide                                            | preclinical                 | 27397505              | B3       |

**Other genes:** here you can find other genes that might be interesting to check (information from Target DB<sup>3</sup> and Meric-Bernstam list<sup>4</sup>). No level information is provided in this section.

| Patient |         | Drug-Gene Interactions  |                                                                  |                                |
|---------|---------|-------------------------|------------------------------------------------------------------|--------------------------------|
| Gene    | Variant | Known Variant           | Description                                                      | Drugs                          |
| FGF1    | I331N   | Mutation; Amplification | Upstream ligand of FGFR, possible sensitivity to FGFR inhibitors | FGFR Inhibitors                |
| ABL2    | amp     | Mutation; Amplification |                                                                  | Treatment with ABL2 inhibitors |
| SRC     | amp     | Mutation; Amplification |                                                                  | Treatment with SRC inhibitors  |

<sup>3</sup>Van Allen et al., Nat Med (2014), v3

<sup>4</sup>Meric-Bernstam et al., J Natl Cancer Inst (2015)

# MTB Report - From somatic variants to treatment options

Department of Medical Statistics, University Medical Center Goettingen

September 27, 2017

## PATIENT INFORMATION

|                             |                    |                          |      |
|-----------------------------|--------------------|--------------------------|------|
| <b>Patient ID</b>           | MASTER-02          | <b>Tissue Type</b>       | ?    |
| <b>Gender</b>               | Male               | <b>Tumor Content (%)</b> | 90   |
| <b>Disease</b>              | Pancreas carcinoma | <b>Number SNVs</b>       | 49   |
| <b>Previous Therapies</b>   | -                  | <b>Number CNVs</b>       | 1433 |
| <b>Tumor Board Decision</b> | -                  | <b>Number Fusions</b>    | 1    |

## GENE-DRUG PREDICTIVE ASSOCIATIONS

**Method:** Somatic variants of the patient (mutations, amplifications, deletions, rearrangements) are searched in curated databases of predictive biomarkers (GKDB<sup>1</sup>, CIViC<sup>2</sup>) and reported according to their clinical evidence (see Levels of Evidence). In the following two tables (SNVs and CNVs), basic information of the somatic variants with relevant clinical implications can be found:

| Gene | Patient's Variant | Level of Evidence         | Variant Freq. | Zygoty | Quality (Phred) |
|------|-------------------|---------------------------|---------------|--------|-----------------|
| KRAS | G12D              | <b>B1 ,A2 ,B2 ,A3 ,B3</b> | 0.40          | het    | 225             |

| Gene   | Patient's Variant | Level of Evidence         | Seg. Mean | Size (Mb) |
|--------|-------------------|---------------------------|-----------|-----------|
| CCND2  | ampl.             | <b>B3</b>                 | 0.53      | 9.3       |
| CDKN2A | del.              | <b>B2 ,B3</b>             | -1.45     | 0.6       |
| CDKN2B | del.              | <b>B3</b>                 | -1.45     | 0.6       |
| FGFR1  | ampl.             | <b>B2 ,B3</b>             | 0.92      | 4.9       |
| KRAS   | G12D,ampl.        | <b>B1 ,A2 ,B2 ,A3 ,B3</b> | 0.52      | 21.1      |
| MTAP   | del.              | <b>B3</b>                 | -1.45     | 0.6       |
| MYC    | ampl.             | <b>B3</b>                 | 1.02      | 13.6      |
| SMAD4  | del.              | <b>B2</b>                 | -1.37     | 0.4       |
| TYMS   | ampl.             | <b>B2</b>                 | 0.51      | 3.0       |

**Levels of Evidence:** Findings are classified into 6 levels of evidence combining the **axis A-B** and the **axis 1-2-3**. Level A means evidence in the same cancer type. Level B means evidence in any other cancer type. On the 1-2-3 axis, level 1 means evidence supported by drug approval organizations or clinical guidelines, level 2 contains clinical evidence (clinical trials, case reports) and level 3 consists of preclinical evidence. The distribution of findings into levels is summarized in the right figure

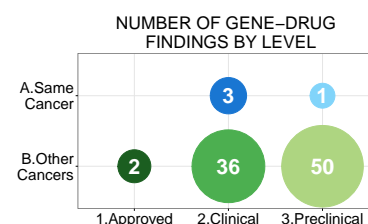

**Table of Results:** All the predictive associations are detailed in this table. The results are sorted by 1) drug frequency, 2) levels of evidence (A1-B1-A2-B2-A3-B3). To allow a quick interpretation, the type of association (response, resistance) is colored (green, red) and new variants are gray and underlined.

| Patient |         | Gene-Drug     |               |             | Associations                                 |              | Evidence                               | PMID      | Level |
|---------|---------|---------------|---------------|-------------|----------------------------------------------|--------------|----------------------------------------|-----------|-------|
| Gene    | Variant | Disease       | Known Variant | Association | Drugs                                        |              |                                        |           |       |
| KRAS    | G12D    | pancreatic    | any (GoF)     | response    | gemcitabine + MEK inhibitors                 | early trials | 23583440                               | <b>A2</b> |       |
|         |         | pancreatic    | any (GoF)     | no response | PI3K pathway inhibitors + MEK inhibitor      | early trials | ASCO 2015 (abstr 4119)                 | <b>A2</b> |       |
|         |         | lung          | any (GoF)     | response    | MEK inhibitors                               | early trials | 23200175, 24947927, 25667274, 25722381 | <b>B2</b> |       |
|         |         | lung          | any (GoF)     | response    | PI3K pathway inhibitors + MEK inhibitors     | early trials | 25516890                               | <b>B2</b> |       |
|         |         | biliary tract | any (GoF)     | response    | MEK inhibitors                               | early trials | 23391555                               | <b>B2</b> |       |
|         |         | colorectal    | ampl. (GoF)   | resistance  | BRAF inhibitor + MEK inhibitor/anti-EGFR mAb | case report  | ENA 2014 (abstr 428)                   | <b>B2</b> |       |
|         |         | colorectal    | any (GoF)     | sensitivity | MEK inhibitors + PI3K pathway inhibitors     | preclinical  | 22392911                               | <b>B3</b> |       |
|         |         | colorectal    | any (GoF)     | sensitivity | MEK inhibitors + BCL-XL inhibitors           | preclinical  | 23245996                               | <b>B3</b> |       |
|         |         | colorectal    | any (GoF)     | sensitivity | MEK inhibitors + IGF1R inhibitors            | preclinical  | 24045180                               | <b>B3</b> |       |
|         |         | AML           | any (GoF)     | sensitivity | MEK inhibitors                               | preclinical  | 22507781                               | <b>B3</b> |       |
|         |         | cervical      | any (GoF)     | sensitivity | MEK inhibitors                               | preclinical  | 22169769                               | <b>B3</b> |       |
|         |         | endometrial   | any (GoF)     | sensitivity | PI3K pathway inhibitors + MEK inhibitors     | preclinical  | 21984976, 22662154                     | <b>B3</b> |       |

<sup>1</sup>Dienstmann et al., Cancer Discov (2015), v19

<sup>2</sup>Griffith et al., Nat Genet (2017), version 01 June 2017

| Patient |         | Gene-Drug            |                        |                            | Associations                             |                 |                                                          |             |          |    |
|---------|---------|----------------------|------------------------|----------------------------|------------------------------------------|-----------------|----------------------------------------------------------|-------------|----------|----|
| Gene    | Variant | Disease              | Known Variant          | Association                | Drugs                                    | Evidence        | PMID                                                     | Level       |          |    |
| CDKN2A  | del.    | myeloma              | any (GoF)              | sensitivity                | PI3K pathway inhibitors + MEK inhibitors | preclinical     | 22985491                                                 | B3          |          |    |
|         |         | breast               | loss                   | sensitivity                | Letrozole,Palbociclib (PD0332991)        | case report     | 26715889                                                 | B2          |          |    |
|         |         | bone ewing sarcoma   | loss                   | sensitivity                | Linsitinib,Palbociclib                   | preclinical     | 27286459                                                 | B3          |          |    |
|         |         | dermatofibro-sarcoma | loss                   | sensitivity                | Palbociclib                              | preclinical     | 25852058                                                 | B3          |          |    |
|         |         | ovarian              | loss                   | sensitivity                | Palbociclib (PD0332991)                  | preclinical     | 21278246                                                 | B3          |          |    |
| CDKN2B  | del.    | renal                | loss                   | sensitivity                | Palbociclib (PD0332991)                  | preclinical     | 23898052                                                 | B3          |          |    |
|         |         | melanoma             | loss                   | sensitivity                | Palbociclib (PD0332991)                  | preclinical     | 24495407                                                 | B3          |          |    |
|         |         | renal                | loss                   | sensitivity                | Palbociclib (PD0332991)                  | preclinical     | 23898052                                                 | B3          |          |    |
|         |         | bone ewing sarcoma   | loss                   | sensitivity                | Palbociclib,Linsitinib                   | preclinical     | 27286459                                                 | B3          |          |    |
| CDKN2A  | del.    | melanoma             | any (LoF)              | response                   | CDK4/6 inhibitors                        | case report     | ASCO 2013 (abstr 2500)                                   | B2          |          |    |
| CCND2   | ampl.   | unspecified          | ampl. (GoF)            | sensitivity                | CDK4/6 inhibitors                        | preclinical     | 22471707                                                 | B3          |          |    |
| CDKN2A  | del.    | unspecified          | any (LoF)              | sensitivity                | CDK4/6 inhibitors                        | preclinical     | 22471707                                                 | B3          |          |    |
|         |         | glioblastoma         | any (LoF)              | sensitivity                | CDK4/6 inhibitors                        | preclinical     | 22586120, 22711607                                       | B3          |          |    |
| CDKN2B  | del.    | unspecified          | any (LoF)              | sensitivity                | CDK4/6 inhibitors                        | preclinical     | 22471707                                                 | B3          |          |    |
|         |         | glioblastoma         | any (LoF)              | sensitivity                | CDK4/6 inhibitors                        | preclinical     | 22711607                                                 | B3          |          |    |
| KRAS    | G12D    | endometrial          | any (GoF)              | resistance                 | PI3K pathway inhibitors                  | preclinical     | 22662154                                                 | B3          |          |    |
|         |         | lung                 | mut.                   | resistance or non-response | Docetaxel,Selumetinib                    | clin. trials    | 28492898                                                 | B2          |          |    |
|         |         | lung                 | any (GoF)              | no response                | selumetinib                              | early trials    | 26802155                                                 | B2          |          |    |
|         |         | colorectal           | mut.                   | sensitivity                | RAF265,Selumetinib (AZD6244)             | preclinical     | 25199829                                                 | B3          |          |    |
|         |         | lung                 | mut.                   | sensitivity                | RAF265,Selumetinib (AZD6244)             | preclinical     | 25199829                                                 | B3          |          |    |
|         |         | colorectal           | mut.                   | sensitivity                | Selumetinib (AZD6244),R1507              | preclinical     | 21985784                                                 | B3          |          |    |
|         |         | lung                 | mut.                   | sensitivity                | Trametinib                               | clin. trials    | 22805291                                                 | B2          |          |    |
|         |         | lung                 | mut.                   | sensitivity                | Trametinib,Docetaxel                     | clin. trials    | 25722381                                                 | B2          |          |    |
|         |         | colorectal           | mut.                   | sensitivity                | Afatinib,Trametinib                      | preclinical     | 24685132                                                 | B3          |          |    |
|         |         | lung                 | mut.                   | sensitivity                | Afatinib,Trametinib                      | preclinical     | 24685132                                                 | B3          |          |    |
|         |         | breast               | mut.                   | sensitivity                | Trametinib                               | preclinical     | 22169769                                                 | B3          |          |    |
|         |         | lung                 | any (GoF)              | sensitivity                | BET inhibitors in LKB1 wt                | preclinical     | 23129625, 24045185                                       | B3          |          |    |
|         |         | MYC                  | ampl.                  | myeloma                    | ampl. (GoF)                              | sensitivity     | BET inhibitors                                           | preclinical | 21889194 | B3 |
|         |         |                      |                        | neuroblastoma              | ampl. (GoF)                              | sensitivity     | BET inhibitors                                           | preclinical | 23430699 | B3 |
| KRAS    | ampl.   | melanoma             | ampl.                  | sensitivity                | Carboplatin,Docetaxel,Sorafenib          | clin. trials    | 26307133                                                 | B2          |          |    |
|         |         | lung                 | mut.                   | sensitivity                | Farnesylthiosalicylic Acid               | clin. trials    | 21847063                                                 | B2          |          |    |
|         |         | lung                 | any (GoF)              | response                   | fatty acid synthase inhibitors           | case report     | AACR 2016, abstr LB214                                   | B2          |          |    |
| FGFR1   | ampl.   | breast               | ampl.                  | sensitivity                | BGJ-398                                  | clin. trials    | 27870574                                                 | B2          |          |    |
|         |         | bladder              | ampl.                  | sensitivity                | BGJ-398                                  | case report     | 27870574                                                 | B2          |          |    |
| KRAS    | G12D    | colorectal           | any (GoF)              | resistance                 | cetuximab, panitumumab                   | FDA-rejected    | FDA                                                      | B1          |          |    |
|         |         | colorectal           | mut.                   | sensitivity                | Cetuximab,Dasatinib                      | preclinical     | 20956938                                                 | B3          |          |    |
|         |         | lung                 | any (GoF)              | resistance                 | EGFR TKIs                                | NCCN guidelines | 20921461                                                 | B1          |          |    |
|         |         | gastric              | any (GoF)              | resistance                 | anti-EGFR mAbs                           | preclinical     | 22614881, 22290393                                       | B3          |          |    |
| FGFR1   | ampl.   | colorectal           | mut.                   | sensitivity                | IMO,EGFR Inhibitor                       | preclinical     | 21890455                                                 | B3          |          |    |
|         |         | lung (squa.)         | ampl. (GoF)            | response                   | FGFR inhibitors                          | early trials    | AACR 2012 (abstract LB-122), AACR 2013 (abstract LB-145) | B2          |          |    |
| KRAS    | G12D    | breast               | ampl. (GoF)            | response                   | FGFR inhibitors                          | early trials    | 25193991                                                 | B2          |          |    |
|         |         |                      | G12A, G12D, G12C, G12S | resistance or non-response | Melphalan                                | clin. trials    | 19284554                                                 | B2          |          |    |
|         |         |                      | G12A, G12D, G12C, G12S | resistance or non-response | Melphalan                                | preclinical     | 11050000,12483530,16497971                               | B2          |          |    |
|         |         | lung                 | any (GoF)              | response                   | pan-RAF inhibitors                       | case report     | AACR 2016 (abstr CT005)                                  | B2          |          |    |
|         |         | endometrial          | any (GoF)              | response                   | pan-RAF inhibitors                       | case report     | AACR 2016 (abstr CT005)                                  | B2          |          |    |

| Patient |         | Gene-Drug          |                        |                   | Associations               |                                             |              |          |    |
|---------|---------|--------------------|------------------------|-------------------|----------------------------|---------------------------------------------|--------------|----------|----|
| Gene    | Variant | Disease            | Known Variant          | Association       | Drugs                      | Evidence                                    | PMID         | Level    |    |
| FGFR1   | ampl.   | colorectal         | G12A, G12V, G12C, G12S | G13D, G12D, G12R, | resistance or non-response | Panitumumab                                 | case report  | 18316791 | B2 |
|         |         | lung               | ampl.                  |                   | sensitivity                | PD173074                                    | preclinical  | 21160078 | B3 |
|         |         | lung               | ampl.                  |                   | sensitivity                | PD173074                                    | preclinical  | 21666749 | B3 |
| KRAS    | G12D    | bone ewing sarcoma | ampl.                  |                   | sensitivity                | Ponatinib                                   | preclinical  | 26179511 | B3 |
|         |         | breast             | mut.                   |                   | n/a                        | Ponatinib                                   | preclinical  | 22238366 | B3 |
|         |         | colorectal         | mut.                   |                   | n/a                        | RO4987655                                   | clin. trials | 24947927 | B2 |
| FGFR1   | ampl.   | lung               | mut.                   |                   | n/a                        | RO4987655                                   | clin. trials | 24947927 | B2 |
|         |         | hepatocellular     | mut.                   |                   | sensitivity                | Sorafenib,Refametinib                       | clin. trials | 25294897 | B2 |
|         |         | breast             | ampl.                  |                   | resistance or non-response | 4-hydroxytamoxifen                          | preclinical  | 20179196 | B3 |
| MTAP    | del.    | breast             | del.                   |                   | sensitivity                | 5-Fluoropyrimidine                          | preclinical  | 26751376 | B3 |
| SMAD4   | del.    | colorectal         | del.                   |                   | resistance or non-response | 5-fluorouracil                              | clin. trials | 12237773 | B2 |
| KRAS    | G12D    | colorectal         | mut.                   |                   | sensitivity                | BAY 86-9766                                 | case report  | 23434733 | B2 |
|         |         | lung               | any (GoF)              |                   | response                   | CDK4/CDK6 inhibitor abemaciclib             | early trials | 27217383 | B2 |
|         |         | colorectal         | G12D                   |                   | sensitivity                | Adoptive T-cell Transfer                    | case report  | 27959684 | B2 |
| FGFR1   | ampl.   | lung               | G12D                   |                   | sensitivity                | ARRY-142886,BEZ235 (NVP-BEZ235, Dactolisib) | preclinical  | 19029981 | B3 |
|         |         | lung               | mut.                   |                   | sensitivity                | Atezolizumab,Nivolumab                      | clin. trials | 28525386 | B2 |
|         |         | breast             | mut.                   |                   | sensitivity                | AZD5438                                     | preclinical  | 26881434 | B3 |
| KRAS    | G12D    | pancreatic         | mut.                   |                   | sensitivity                | SCH772984,AZD8186                           | preclinical  | 26725216 | A3 |
|         |         | colorectal         | mut.                   |                   | resistance or non-response | Chemotherapy,Bevacizumab                    | clin. trials | 23828442 | B2 |
|         |         | lung               | ampl.                  |                   | sensitivity                | BGJ398                                      | clin. trials | 27870574 | B2 |
| FGFR1   | ampl.   | colorectal         | any (GoF)              |                   | sensitivity                | mTOR inhibitors + BH3 mimetics              | preclinical  | 24163374 | B3 |
| MYC     | ampl.   | neuroblastoma      | ampl. (GoF)            |                   | sensitivity                | CDK7 inhibitors                             | preclinical  | 25416950 | B3 |
| KRAS    | G12D    | ovarian            | mut.                   |                   | sensitivity                | Decitabine                                  | preclinical  | 25968887 | B3 |
| FGFR1   | ampl.   | breast             | ampl.                  |                   | sensitivity                | Dovitinib                                   | clin. trials | 23658459 | B2 |
| MYC     | ampl.   | neuroblastoma      | ampl. (GoF)            |                   | sensitivity                | FACT inhibitor                              | preclinical  | 26537256 | B3 |
| CDKN2A  | del.    | melanoma           | loss                   |                   | sensitivity                | Flavopiridol                                | preclinical  | 12777976 | B3 |
| KRAS    | G12D    | breast             | mut.                   |                   | sensitivity                | GDC-0623,G-573                              | preclinical  | 23934108 | B3 |
|         |         | lung               | G12A, G12D, G12C, G12S |                   | resistance or non-response | Gefitinib                                   | clin. trials | 17409929 | B2 |
|         |         | colorectal         | mut.                   |                   | resistance or non-response | Ixazomib                                    | preclinical  | 26709701 | B3 |
| TYMS    | ampl.   | pancreatic         | G12D                   |                   | sensitivity                | MK-2206                                     | case report  | 22025163 | A2 |
|         |         | lung               | ampl.                  |                   | resistance or non-response | Pemetrexed                                  | clin. trials | 23645741 | B2 |
| MYC     | ampl.   | prostate           | ampl. (GoF)            |                   | sensitivity                | PIM inhibitors                              | preclinical  | 25505253 | B3 |
| KRAS    | G12D    | endometrial        | mut.                   |                   | sensitivity                | Ridaforolimus,Temsirolimus                  | clin. trials | 24166148 | B2 |
| MYC     | ampl.   | colorectal         | ampl. (GoF)            |                   | sensitivity                | temozolomide                                | preclinical  | 27397505 | B3 |
| KRAS    | G12D    |                    | G12D                   |                   | resistance or non-response | Vemurafenib                                 | case report  | 26352686 | B2 |

**Other genes:** here you can find other genes that might be interesting to check (information from Target DB<sup>3</sup> and Meric-Bernstam list<sup>4</sup>). No level information is provided in this section.

[1] "No other genes found"

<sup>3</sup>Van Allen et al., Nat Med (2014), v3

<sup>4</sup>Meric-Bernstam et al., J Natl Cancer Inst (2015)

# MTB Report - From somatic variants to treatment options

Department of Medical Statistics, University Medical Center Goettingen

September 27, 2017

## PATIENT INFORMATION

|                             |                                                                 |                          |      |
|-----------------------------|-----------------------------------------------------------------|--------------------------|------|
| <b>Patient ID</b>           | MASTER-03                                                       | <b>Tissue Type</b>       | ?    |
| <b>Gender</b>               | Female                                                          | <b>Tumor Content (%)</b> | NA   |
| <b>Disease</b>              | Leiomyosarcoma of retroperitoneum with lung metastasis          | <b>Number SNVs</b>       | 31   |
| <b>Previous Therapies</b>   | Doxorubicin, Ifosfamid                                          | <b>Number CNVs</b>       | 3964 |
| <b>Tumor Board Decision</b> | PTPRJ deletion : Pazopanib; CDK12 + BRCA2 deletions : Cisplatin | <b>Number Fusions</b>    | 6    |

## GENE-DRUG PREDICTIVE ASSOCIATIONS

**Method:** Somatic variants of the patient (mutations, amplifications, deletions, rearrangements) are searched in curated databases of predictive biomarkers (GKDB<sup>1</sup>, CIViC<sup>2</sup>) and reported according to their clinical evidence (see Levels of Evidence). In the following two tables (SNVs and CNVs), basic information of the somatic variants with relevant clinical implications can be found:

| Gene        | Patient's Variant        | Level of Evidence        | Variant Freq.    | Zygoty           | Quality (Phred) |
|-------------|--------------------------|--------------------------|------------------|------------------|-----------------|
| <b>Gene</b> | <b>Patient's Variant</b> | <b>Level of Evidence</b> | <b>Seg. Mean</b> | <b>Size (Mb)</b> |                 |
| BRCA2       | del.                     | <b>B2 ,B3</b>            | -0.81            | 3.7              |                 |
| FANCA       | del.                     | <b>B2</b>                | -0.66            | 43.8             |                 |
| HSPH1       | del.                     | <b>B2</b>                | -0.81            | 3.7              |                 |
| RB1         | del.                     | <b>B3</b>                | -0.64            | 45.0             |                 |

**Levels of Evidence:** Findings are classified into 6 levels of evidence combining the **axis A-B** and the **axis 1-2-3**. Level A means evidence in the same cancer type. Level B means evidence in any other cancer type. On the 1-2-3 axis, level 1 means evidence supported by drug approval organizations or clinical guidelines, level 2 contains clinical evidence (clinical trials, case reports) and level 3 consists of preclinical evidence. The distribution of findings into levels is summarized in the right figure

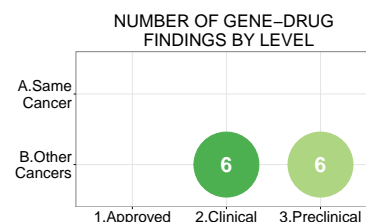

**Table of Results:** All the predictive associations are detailed in this table. The results are sorted by 1) drug frequency, 2) levels of evidence (A1-B1-A2-B2-A3-B3). To allow a quick interpretation, the type of association (response, resistance) is colored (green, red) and new variants are gray and underlined.

| Patient |         | Gene-Drug      |               |                            | Associations               |              | Evidence           | PMID      | Level |
|---------|---------|----------------|---------------|----------------------------|----------------------------|--------------|--------------------|-----------|-------|
| Gene    | Variant | Disease        | Known Variant | Association                | Drugs                      |              |                    |           |       |
| BRCA2   | del.    | ovarian        | (LoF), mut.   | sensitivity                | Olaparib                   | clin. trials | 23346317,2186240   | <b>B2</b> |       |
| RB1     | del.    | prostate       | (LoF)         | sensitivity                | Olaparib                   | clin. trials | 26510020           | <b>B2</b> |       |
|         |         | breast         | (LoF)         | resistance or non-response | Palbociclib (PD0332991)    | preclinical  | 20473330           | <b>B3</b> |       |
|         |         | glioblastoma   | (LoF)         | resistance or non-response | Palbociclib (PD0332991)    | preclinical  | 20354191           | <b>B3</b> |       |
| FANCA   | del.    | prostate       | any (LoF)     | response                   | PARP inhibitors            | early trials | 26510020           | <b>B2</b> |       |
| BRCA2   | del.    | ovarian        | del. (LoF)    | sensitivity                | PARP inhibitors            | preclinical  | 22392482           | <b>B3</b> |       |
|         |         | breast         | (LoF)         | sensitivity                | Talazoparib                | clin. trials | 28242752           | <b>B2</b> |       |
|         |         | ovarian        | (LoF)         | sensitivity                | Talazoparib                | clin. trials | 28242752           | <b>B2</b> |       |
| HSPH1   | del.    | colorectal     | T17 del.      | sensitivity                | Oxaliplatin,5-fluorouracil | clin. trials | 24512910           | <b>B2</b> |       |
| RB1     | del.    | retinoblastoma | any (LoF)     | sensitivity                | HDAC inhibitors            | preclinical  | 18483379           | <b>B3</b> |       |
|         |         | retinoblastoma | any (LoF)     | sensitivity                | MDM2/MDMX inhibitors       | preclinical  | 17080083, 21515735 | <b>B3</b> |       |
| BRCA2   | del.    |                | (LoF)         | sensitivity                | Mitomycin C                | preclinical  | 16243825           | <b>B3</b> |       |

**Other genes:** here you can find other genes that might be interesting to check (information from Target DB<sup>3</sup> and Meric-Bernstam list<sup>4</sup>). No level information is provided in this section.

| Patient |         | Drug-Gene Interactions |             |       |
|---------|---------|------------------------|-------------|-------|
| Gene    | Variant | Known Variant          | Description | Drugs |

<sup>1</sup>Dienstmann et al., Cancer Discov (2015), v19

<sup>2</sup>Griffith et al., Nat Genet (2017), version 01 June 2017

<sup>3</sup>Van Allen et al., Nat Med (2014), v3

<sup>4</sup>Meric-Bernstam et al., J Natl Cancer Inst (2015)

| Patient |         | Drug-Gene Interactions   |                                                                                                                                  |                               |
|---------|---------|--------------------------|----------------------------------------------------------------------------------------------------------------------------------|-------------------------------|
| Gene    | Variant | Known Variant            | Description                                                                                                                      | Drugs                         |
| ESR1    | amp     | Amplification; Mutations | Amplification may predict ER positivity in breast cancer. Mutation may predict resistance to endocrine therapy in breast cancer. | Hormonal therapy              |
| MAP3K4  | amp     | Mutation; Amplification  |                                                                                                                                  | Treatment with JNK1 inhibitor |

# MTB Report - From somatic variants to treatment options

Department of Medical Statistics, University Medical Center Goettingen

September 27, 2017

## PATIENT INFORMATION

|                             |                                             |                          |      |
|-----------------------------|---------------------------------------------|--------------------------|------|
| <b>Patient ID</b>           | MASTER-04                                   | <b>Tissue Type</b>       | ?    |
| <b>Gender</b>               | Female                                      | <b>Tumor Content (%)</b> | 20   |
| <b>Disease</b>              | Ovarian carcinoma metastasis                | <b>Number SNVs</b>       | 98   |
| <b>Previous Therapies</b>   | -                                           | <b>Number CNVs</b>       | 3555 |
| <b>Tumor Board Decision</b> | TSC2 stopgain : mTOR-Inhibitor (Everolimus) | <b>Number Fusions</b>    | 16   |

## GENE-DRUG PREDICTIVE ASSOCIATIONS

**Method:** Somatic variants of the patient (mutations, amplifications, deletions, rearrangements) are searched in curated databases of predictive biomarkers (GKDB<sup>1</sup>, CIViC<sup>2</sup>) and reported according to their clinical evidence (see Levels of Evidence). In the following two tables (SNVs and CNVs), basic information of the somatic variants with relevant clinical implications can be found:

| Gene | Patient's Variant | Level of Evidence | Variant Freq. | Zygoty | Quality (Phred) |
|------|-------------------|-------------------|---------------|--------|-----------------|
| BCOR | S1024T            | B3                | 0.18          | het    | 88              |
| TP53 | Y236C             | A2 ,B2 ,B3        | 0.79          | het    | 225             |
| TSC2 | R505X             | B2 ,B3            | 0.42          | het    | 221             |

| Gene   | Patient's Variant | Level of Evidence | Seg. Mean | Size (Mb) |
|--------|-------------------|-------------------|-----------|-----------|
| AURKA  | ampl.             | B3                | 0.58      | 39.2      |
| BIRC7  | ampl.             | B3                | 0.58      | 39.2      |
| BRCA1  | del.              | A2 ,B2 ,A3 ,B3    | -0.84     | 2.6       |
| CCNE1  | ampl.             | A3 ,B3            | 0.73      | 15.2      |
| CDK12  | del.              | A3                | -0.87     | 1.9       |
| FANCA  | del.              | B2                | -0.71     | 59.8      |
| FRS2   | ampl.             | B3                | 0.73      | 6.5       |
| MDM2   | ampl.             | B2                | 0.73      | 6.5       |
| NF1    | del.              | B2 ,B3            | -0.85     | 2.6       |
| PALB2  | del.              | B2 ,B3            | -0.70     | 17.5      |
| RICTOR | ampl.             | B2                | 1.56      | 12.5      |
| SUZ12  | del.              | B3                | -0.87     | 4.5       |
| TOP1   | ampl.             | B2                | 0.58      | 39.2      |
| TSC2   | R505X,del.        | B2 ,B3            | -0.78     | 11.2      |

**Levels of Evidence:** Findings are classified into 6 levels of evidence combining the **axis A-B** and the **axis 1-2-3**. Level A means evidence in the same cancer type. Level B means evidence in any other cancer type. On the 1-2-3 axis, level 1 means evidence supported by drug approval organizations or clinical guidelines, level 2 contains clinical evidence (clinical trials, case reports) and level 3 consists of preclinical evidence. The distribution of findings into levels is summarized in the right figure

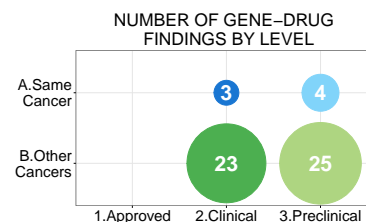

**Table of Results:** All the predictive associations are detailed in this table. The results are sorted by 1) drug frequency, 2) levels of evidence (A1-B1-A2-B2-A3-B3). To allow a quick interpretation, the type of association (response, resistance) is colored (green, red) and new variants are gray and underlined.

| Patient | Gene-Drug |                |               |             | Associations        |              |                                   |       |  |
|---------|-----------|----------------|---------------|-------------|---------------------|--------------|-----------------------------------|-------|--|
| Gene    | Variant   | Disease        | Known Variant | Association | Drugs               | Evidence     | PMID                              | Level |  |
| FANCA   | del.      | prostate       | any (LoF)     | response    | PARP inhibitors     | early trials | 26510020                          | B2    |  |
| PALB2   | del.      | prostate       | any (LoF)     | response    | PARP inhibitors     | early trials | AACR 2015 (abstr CT322), 26510020 | B2    |  |
| BRCA1   | del.      | ovarian        | del. (LoF)    | sensitivity | PARP inhibitors     | preclinical  | 22392482                          | A3    |  |
| CDK12   | del.      | ovarian        | any (LoF)     | sensitivity | PARP inhibitors     | preclinical  | 24240700, 24554720                | A3    |  |
| PALB2   | del.      | pancreatic     | any (LoF)     | sensitivity | PARP inhibitors     | preclinical  | 25263539, NCT01585805             | B3    |  |
| TSC2    | R505X     | angiomyolipoma | any (LoF)     | response    | mTOR inhibitors     | early trials | 23312829, 21525172, 20048174      | B2    |  |
| RICTOR  | ampl.     | lung           | ampl. (GoF)   | response    | mTORC1/2 inhibitors | case report  | 26370156                          | B2    |  |
| NF1     | del.      | neurosarcoma   | any (LoF)     | sensitivity | mTOR inhibitors     | preclinical  | 18483311, 20505189, 24509877      | B3    |  |

<sup>1</sup>Dienstmann et al., Cancer Discov (2015), v19

<sup>2</sup>Griffith et al., Nat Genet (2017), version 01 June 2017



| Patient |         | Gene-Drug                               |                    |                            | Associations                          |              |                                   |       |  |
|---------|---------|-----------------------------------------|--------------------|----------------------------|---------------------------------------|--------------|-----------------------------------|-------|--|
| Gene    | Variant | Disease                                 | Known Variant      | Association                | Drugs                                 | Evidence     | PMID                              | Level |  |
|         |         | neurosarcoma                            | any (LoF)          | sensitivity                | mTOR inhibitors + HSP90 inhibitors    | preclinical  | 21907929                          | B3    |  |
|         |         | glioblastoma                            | any (LoF)          | sensitivity                | mTOR inhibitors                       | preclinical  | 19573811                          | B3    |  |
|         |         | melanoma                                | any (LoF)          | resistance                 | selumetinib in BRAF mutant tumors     | case report  | 23444215, 23288408                | B2    |  |
|         |         | melanoma                                | any (LoF)          | resistance                 | BRAF inhibitors in BRAF mutant tumor  | preclinical  | 23288408, 24576830                | B3    |  |
| MDM2    | ampl.   |                                         | ampl. (GoF)        | resistance                 | cisplatin                             | early trials | 27646943                          | B2    |  |
| TP53    | Y236C   |                                         | mut. (LoF)         | resistance                 | cisplatin                             | early trials | 27646943                          | B2    |  |
| BIRC7   | ampl.   | colorectal                              | ampl.              | resistance or non-response | Cisplatin                             | preclinical  | 23188704                          | B3    |  |
| NF1     | del.    | neurosarcoma                            | any (LoF)          | no response                | everolimus + bevacizumab              | early trials | ASCO 2016 (abstr 11053)           | B2    |  |
| TSC2    | R505X   | thyroid                                 | any (LoF)          | response                   | everolimus                            | case report  | 25295501                          | B2    |  |
|         |         | gastric                                 | any (LoF)          | response                   | everolimus                            | case report  | 26859683                          | B2    |  |
| BRCA1   | del.    | ovarian                                 | (LoF), mut.        | sensitivity                | Olaparib                              | clin. trials | 23346317,21862407                 | A2    |  |
|         |         | prostate                                | (LoF)              | sensitivity                | Olaparib                              | case report  | 26510020                          | B2    |  |
| CDK12   | del.    | ovarian                                 | (LoF)              | sensitivity                | Olaparib                              | preclinical  | 24240700                          | A3    |  |
| AURKA   | ampl.   | unspecified                             | ampl. (GoF)        | sensitivity                | AURK inhibitors                       | preclinical  | 22302096                          | B3    |  |
|         |         | prostate                                | ampl. (GoF)        | sensitivity                | AURK inhibitors                       | preclinical  | 22389870                          | B3    |  |
| TP53    | Y236C   | AML                                     | mut. (LoF)         | response                   | decitabine                            | early trials | 27959731                          | B2    |  |
|         |         | MDS                                     | mut. (LoF)         | response                   | decitabine                            | early trials | 27959731                          | B2    |  |
|         |         | lung                                    | mut.               | resistance or non-response | Docetaxel                             | preclinical  | 22425996                          | B3    |  |
|         |         | lung                                    | mut.               | sensitivity                | Docetaxel,Selumetinib (AZD6244)       | preclinical  | 22425996                          | B3    |  |
|         |         | unspecified                             | R248Q, R175H (GoF) | sensitivity                | HSP90 inhibitors                      | preclinical  | 26009011                          | B3    |  |
| TSC2    | R505X   | lymphangioma                            | any (LoF)          | sensitivity                | SRC inhibitors                        | preclinical  | 24691995                          | B3    |  |
|         |         | lymphangioma                            | any (LoF)          | sensitivity                | SRC inhibitors                        | preclinical  | 24691995                          | B3    |  |
| BRCA1   | del.    | ovarian                                 | (LoF)              | sensitivity                | Talazoparib                           | clin. trials | 28242752                          | A2    |  |
|         |         | breast                                  | (LoF)              | sensitivity                | Talazoparib                           | clin. trials | 28242752                          | B2    |  |
| TP53    | Y236C   | ovarian                                 | any (GoF)          | response                   | WEE1 inhibitors + carboplatin         | early trials | ASCO2015 (abstr 2507)             | A2    |  |
|         |         | head and neck                           | any (LoF)          | sensitivity                | WEE1 inhibitors                       | preclinical  | 25125259                          | B3    |  |
|         |         | breast                                  | mut. (LoF)         | resistance                 | CDK4/CDK6 inhibitor abemaciclib       | early trials | 27217383                          | B2    |  |
|         |         | CLL                                     | mut.               | sensitivity                | Alemtuzumab                           | clin. trials | 14726385                          | B2    |  |
| BCOR    | S1024T  | gastric                                 | mut. (LoF)         | sensitivity                | enzastaurin (PKCbeta inhibitor)       | preclinical  | 27397505                          | B3    |  |
| SUZ12   | del.    | unspecified                             | any (LoF)          | sensitivity                | BET inhibitors                        | preclinical  | 25119042                          | B3    |  |
| RICTOR  | ampl.   | lung                                    | ampl.              | sensitivity                | MLN0128,Cc-223                        | case report  | 26370156                          | B2    |  |
| CCNE1   | ampl.   | unspecified                             | ampl. (GoF)        | sensitivity                | CDK2 inhibitors                       | preclinical  | 22471707                          | B3    |  |
| TP53    | Y236C   | gastric                                 | mut.               | sensitivity                | Chemotherapy                          | clin. trials | 24740294                          | B2    |  |
| NF1     | del.    | malignant peripheral nerve sheath tumor | loss               | sensitivity                | JQ1 Compound                          | preclinical  | 24373973                          | B3    |  |
| BRCA1   | del.    | breast                                  | (LoF)              | sensitivity                | CX-5461,CX-3543                       | preclinical  | 28211448                          | B3    |  |
| CCNE1   | ampl.   | ovarian                                 | ampl.              | sensitivity                | Dinaciclib,MK-2206                    | preclinical  | 27663592                          | A3    |  |
| TP53    | Y236C   | bladder                                 | mut. (LoF)         | sensitivity                | mitomycin C, gemcitabine, doxorubicin | preclinical  | 27397505                          | B3    |  |
| FRS2    | ampl.   | liposarcoma                             | ampl. (GoF)        | sensitivity                | FGFR inhibitors                       | preclinical  | 23393200                          | B3    |  |
| TOP1    | ampl.   | colorectal                              | ampl., expression  | sensitivity                | Irinotecan                            | clin. trials | 24256029,19775480                 | B2    |  |
| MDM2    | ampl.   | liposarcoma                             | ampl. (GoF)        | response                   | MDM2 inhibitors (tumors TP53 wt)      | early trials | 23084521, ASCO 2015 (abstr 10564) | B2    |  |
| NF1     | del.    | neurosarcoma                            | any (LoF)          | sensitivity                | MEK inhibitors                        | preclinical  | 23221341                          | B3    |  |
| PALB2   | del.    | pancreatic                              | any (LoF)          | response                   | Mytomycin C                           | case report  | 21135251                          | B2    |  |
| CCNE1   | ampl.   | breast                                  | ampl.              | resistance or non-response | Palbociclib (PD0332991)               | preclinical  | 27020857                          | B3    |  |
| NF1     | del.    | melanoma                                | any (LoF)          | response                   | PD1 blockade                          | early trials | ASCO 2016 (abstr 105)             | B2    |  |
| PALB2   | del.    | pancreatic                              | any (LoF)          | response                   | platinum                              | case report  | 25719666                          | B2    |  |
| TP53    | Y236C   | thymic lymphoma                         | any (LoF)          | sensitivity                | pramlintide                           | preclinical  | 25409149                          | B3    |  |
| NF1     | del.    | melanoma                                | any (LoF)          | sensitivity                | trametinib                            | preclinical  | 24576830                          | B3    |  |

**Other genes:** here you can find other genes that might be interesting to check (information from Target DB<sup>3</sup> and Meric-Bernstam list<sup>4</sup>). No level information is provided in this section.

| Patient |         | Drug-Gene Interactions  |             |                               |
|---------|---------|-------------------------|-------------|-------------------------------|
| Gene    | Variant | Known Variant           | Description | Drugs                         |
| SRC     | amp     | Mutation; Amplification |             | Treatment with SRC inhibitors |

---

<sup>3</sup>Van Allen et al., Nat Med (2014), v3

<sup>4</sup>Meric-Bernstam et al., J Natl Cancer Inst (2015)

# MTB Report - From somatic variants to treatment options

Department of Medical Statistics, University Medical Center Goettingen

September 27, 2017

## PATIENT INFORMATION

|                             |                                                                                      |                          |     |
|-----------------------------|--------------------------------------------------------------------------------------|--------------------------|-----|
| <b>Patient ID</b>           | MASTER-05                                                                            | <b>Tissue Type</b>       | ?   |
| <b>Gender</b>               | Female                                                                               | <b>Tumor Content (%)</b> | 100 |
| <b>Disease</b>              | Myoxid liposarcoma                                                                   | <b>Number SNVs</b>       | 11  |
| <b>Previous Therapies</b>   | Doxorubicin, Dacarbacin                                                              | <b>Number CNVs</b>       | 107 |
| <b>Tumor Board Decision</b> | PIK3CA and PTEN missense mutations:<br>mTOR inhibitor, AKT inhibitor, PI3K inhibitor | <b>Number Fusions</b>    | 2   |

## GENE-DRUG PREDICTIVE ASSOCIATIONS

**Method:** Somatic variants of the patient (mutations, amplifications, deletions, rearrangements) are searched in curated databases of predictive biomarkers (GKDB<sup>1</sup>, CIViC<sup>2</sup>) and reported according to their clinical evidence (see Levels of Evidence). In the following two tables (SNVs and CNVs), basic information of the somatic variants with relevant clinical implications can be found:

| Gene   | Patient's Variant | Level of Evidence | Variant Freq. | Zygoty | Quality (Phred) |
|--------|-------------------|-------------------|---------------|--------|-----------------|
| PIK3CA | C420R             | B2,B3             | 0.39          | het    | 219             |
| PTEN   | R130G             | B2,B3             | 0.71          | het    | 225             |

| Gene   | Patient's Variant | Level of Evidence | Seg. Mean | Size (Mb) |
|--------|-------------------|-------------------|-----------|-----------|
| CDKN2A | del.              | B2,B3             | -1.35     | 1.0       |
| CDKN2B | del.              | B3                | -1.35     | 1.0       |
| MTAP   | del.              | B3                | -1.35     | 1.0       |

**Levels of Evidence:** Findings are classified into 6 levels of evidence combining the **axis A-B** and the **axis 1-2-3**. Level A means evidence in the same cancer type. Level B means evidence in any other cancer type. On the 1-2-3 axis, level 1 means evidence supported by drug approval organizations or clinical guidelines, level 2 contains clinical evidence (clinical trials, case reports) and level 3 consists of preclinical evidence. The distribution of findings into levels is summarized in the right figure

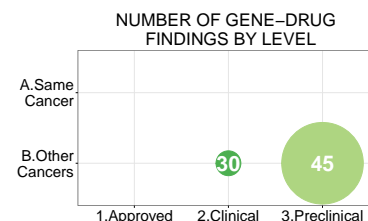

**Table of Results:** All the predictive associations are detailed in this table. The results are sorted by 1) drug frequency, 2) levels of evidence (A1-B1-A2-B2-A3-B3). To allow a quick interpretation, the type of association (response, resistance) is colored (green, red) and new variants are gray and underlined.

| Patient |         | Gene-Drug Associations |               |             | Evidence                                          |              | PMID                                            | Level |
|---------|---------|------------------------|---------------|-------------|---------------------------------------------------|--------------|-------------------------------------------------|-------|
| Gene    | Variant | Disease                | Known Variant | Association | Drugs                                             | Evidence     | PMID                                            | Level |
| PIK3CA  | C420R   | breast                 | any (GoF)     | response    | PI3K alpha inhibitors                             | early trials | AACR 2013 (abstr LB-64), ESMO 2013 (abstr P017) | B2    |
|         |         | breast                 | any (GoF)     | response    | PI3K pathway inhibitors                           | early trials | 22271473                                        | B2    |
|         |         | cervical               | any (GoF)     | response    | PI3K pathway inhibitors                           | early trials | 22271473, ASCO 2013                             | B2    |
|         |         | endometrial            | any (GoF)     | response    | PI3K pathway inhibitors                           | early trials | 22271473, 27672108                              | B2    |
|         |         | ovarian                | any (GoF)     | response    | PI3K pathway inhibitors                           | early trials | 22271473, AACR 2013 (abstr LB-66), 25231405     | B2    |
|         |         | gastric                | any (GoF)     | response    | PI3K alpha inhibitors                             | case report  | ASCO 2015 (abstr 2501)                          | B2    |
|         |         | bladder                | any (GoF)     | response    | PI3K pathway inhibitors                           | case report  | ASCO 2015 (abstr 2516)                          | B2    |
|         |         | head and neck          | any (GoF)     | response    | PI3K pathway inhibitors                           | case report  | 26787751, 26763254                              | B2    |
| PTEN    | R130G   | prostate               | any (LoF)     | response    | PI3K beta inhibitor                               | case report  | ESMO 2013 (abstr P017), ASCO 2014 (abstr 2514)  | B2    |
|         |         | colorectal             | any (GoF)     | sensitivity | PI3K pathway inhibitors (alone or in combination) | preclinical  | 23475782, 22392911                              | B3    |

<sup>1</sup>Dienstmann et al., Cancer Discov (2015), v19

<sup>2</sup>Griffith et al., Nat Genet (2017), version 01 June 2017

| Patient |           | Gene-Drug            |                                          |                            | Associations                                        |              |                              |       |  |
|---------|-----------|----------------------|------------------------------------------|----------------------------|-----------------------------------------------------|--------------|------------------------------|-------|--|
| Gene    | Variant   | Disease              | Known Variant                            | Association                | Drugs                                               | Evidence     | PMID                         | Level |  |
| PTEN    | R130G     | lung                 | any (GoF)                                | sensitivity                | PI3K pathway inhibitors (alone or in combination)   | preclinical  | 23136191                     | B3    |  |
|         |           | glioblastoma         | any (GoF)                                | sensitivity                | PI3K pathway inhibitors                             | preclinical  | 19671762                     | B3    |  |
|         |           | thyroid              | any (GoF)                                | sensitivity                | PI3K pathway inhibitors                             | preclinical  | 21289267                     | B3    |  |
|         |           | breast               | mut.                                     | sensitivity                | PI3K Inhibitor,Palbociclib (PD0332991)              | preclinical  | 25002028                     | B3    |  |
|         |           | breast               | mut.                                     | sensitivity                | PI3K Inhibitor,Ribociclib                           | preclinical  | 25002028                     | B3    |  |
|         |           | prostate             | any (LoF)                                | sensitivity                | PI3K pathway inhibitors + AR antagonists            | preclinical  | 21575859                     | B3    |  |
|         |           | endometrial          | any (LoF)                                | sensitivity                | PI3K pathway inhibitors                             | preclinical  | 22662154                     | B3    |  |
|         |           | breast               | any (LoF)                                | sensitivity                | PI3K pathway inhibitors                             | preclinical  | 23085766, 22932669           | B3    |  |
|         |           | thyroid              | any (LoF)                                | sensitivity                | PI3K pathway inhibitors                             | preclinical  | 21289267                     | B3    |  |
|         |           | ovarian              | any (LoF)                                | sensitivity                | PI3K pathway inhibitors                             | preclinical  | 21632463                     | B3    |  |
| ovarian | any (LoF) | sensitivity          | PI3K pathway inhibitors + MEK inhibitors | preclinical                | 21632463                                            | B3           |                              |       |  |
| CDKN2A  | del.      | glioblastoma         | any (LoF)                                | sensitivity                | PI3K pathway inhibitors (alone or in combination)   | preclinical  | 21325073, 21191045, 17804702 | B3    |  |
|         |           | lung                 | any (LoF)                                | sensitivity                | PI3K pathway inhibitors (alone or in combination)   | preclinical  | 23136191                     | B3    |  |
|         |           | breast               | loss                                     | sensitivity                | Letrozole,Palbociclib (PD0332991)                   | case report  | 26715889                     | B2    |  |
|         |           | bone ewing sarcoma   | loss                                     | sensitivity                | Linsitinib,Palbociclib                              | preclinical  | 27286459                     | B3    |  |
|         |           | dermatofibro-sarcoma | loss                                     | sensitivity                | Palbociclib                                         | preclinical  | 25852058                     | B3    |  |
|         |           | ovarian              | loss                                     | sensitivity                | Palbociclib (PD0332991)                             | preclinical  | 21278246                     | B3    |  |
|         |           | renal                | loss                                     | sensitivity                | Palbociclib (PD0332991)                             | preclinical  | 23898052                     | B3    |  |
|         |           | melanoma             | loss                                     | sensitivity                | Palbociclib (PD0332991)                             | preclinical  | 24495407                     | B3    |  |
|         |           | renal                | loss                                     | sensitivity                | Palbociclib (PD0332991)                             | preclinical  | 23898052                     | B3    |  |
|         |           | bone ewing sarcoma   | loss                                     | sensitivity                | Palbociclib,Linsitinib                              | preclinical  | 27286459                     | B3    |  |
| PIK3CA  | C420R     | breast               | any (GoF)                                | response                   | everolimus + trastuzumab + chemotherapy (HER2 ampl) | late trials  | 27091708                     | B2    |  |
|         |           | breast               | mut.                                     | sensitivity                | Everolimus                                          | clin. trials | 27091708                     | B2    |  |
| PTEN    | R130G     | breast               | any (LoF)                                | response                   | everolimus + trastuzumab + chemotherapy (HER2 ampl) | late trials  | 27091708                     | B2    |  |
|         |           | endometrial          | mut.                                     | sensitivity                | Everolimus                                          | clin. trials | 23238879                     | B2    |  |
| PIK3CA  | C420R     | prostate             | any (LoF)                                | response                   | everolimus                                          | early trials | 23582881                     | B2    |  |
|         |           | breast               | mut.                                     | sensitivity                | Everolimus,PP242                                    | preclinical  | 21358673                     | B3    |  |
| CDKN2A  | del.      | melanoma             | any (LoF)                                | response                   | CDK4/6 inhibitors                                   | case report  | ASCO 2013 (abstr 2500)       | B2    |  |
|         |           | unspecified          | any (LoF)                                | sensitivity                | CDK4/6 inhibitors                                   | preclinical  | 22471707                     | B3    |  |
| CDKN2A  | del.      | glioblastoma         | any (LoF)                                | sensitivity                | CDK4/6 inhibitors                                   | preclinical  | 22586120, 22711607           | B3    |  |
|         |           | unspecified          | any (LoF)                                | sensitivity                | CDK4/6 inhibitors                                   | preclinical  | 22471707                     | B3    |  |
| PIK3CA  | C420R     | glioblastoma         | any (LoF)                                | sensitivity                | CDK4/6 inhibitors                                   | preclinical  | 22711607                     | B3    |  |
|         |           | endometrial          | mut.                                     | sensitivity                | Pictilisib                                          | preclinical  | 23674493                     | B3    |  |
| PIK3CA  | C420R     | breast               | mut.                                     | sensitivity                | Pictilisib,17-AAG                                   | preclinical  | 25855885                     | B3    |  |
|         |           | head and neck        | mut.                                     | sensitivity                | Pictilisib,Trametinib,17-AAG                        | preclinical  | 25855885                     | B3    |  |
| PTEN    | R130G     | head and neck        | mut.                                     | sensitivity                | Pictilisib,17-AAG                                   | preclinical  | 25855885                     | B3    |  |
|         |           | breast               | mut.                                     | sensitivity                | AZD5363                                             | preclinical  | 22294718                     | B3    |  |
| PIK3CA  | C420R     | breast               | mut.                                     | sensitivity                | AZD5363                                             | preclinical  | 22294718                     | B3    |  |
|         |           | gastric              | mut.                                     | sensitivity                | AZD5363                                             | preclinical  | 24088382                     | B3    |  |
| PTEN    | R130G     | melanoma             | any (LoF)                                | resistance                 | BRAF inhibitors in BRAF mutant tumor                | preclinical  | 21317224, 21725359           | B3    |  |
|         |           | melanoma             | any (LoF)                                | resistance                 | MEK inhibitors in BRAF mutant tumors                | preclinical  | 23039341                     | B3    |  |
| PIK3CA  | C420R     | breast               | mut.                                     | resistance or non-response | Trastuzumab                                         | clin. trials | 17936563                     | B2    |  |
|         |           | breast               | any (GoF)                                | response                   | AKT inhibitors                                      | early trials | ASCO 2015 (abstr 2500)       | B2    |  |
| PTEN    | R130G     | pancreatic           | any (LoF)                                | response                   | AKT inhibitors                                      | case report  | 22025163                     | B2    |  |
|         |           | breast               | mut.                                     | sensitivity                | BYL719 (Alpelisib)                                  | preclinical  | 24608574                     | B3    |  |
| PIK3CA  | C420R     | prostate             | mut.                                     | sensitivity                | BYL719                                              | preclinical  | 25544636                     | B3    |  |
|         |           | colorectal           | mut.                                     | resistance or non-response | Anti-EGFR Monoclonal Antibody                       | clin. trials | 23435830                     | B2    |  |

| Patient |         | Gene-Drug     |               |                            | Associations                    |              |                        |       |
|---------|---------|---------------|---------------|----------------------------|---------------------------------|--------------|------------------------|-------|
| Gene    | Variant | Disease       | Known Variant | Association                | Drugs                           | Evidence     | PMID                   | Level |
| PTEN    | R130G   | colorectal    | any (LoF)     | resistance                 | anti-EGFR mAbs                  | late trials  | 21163703, 19398573     | B2    |
| PIK3CA  | C420R   | colorectal    | any (GoF)     | resistance                 | cetuximab                       | late trials  | 19223544, 20619739     | B2    |
|         |         | colorectal    | mut.          | resistance or non-response | Cetuximab                       | preclinical  | 22586653               | B3    |
|         |         | head and neck | mut.          | sensitivity                | Taselisib (GDC-0032), Radiation | preclinical  | 26589432               | B3    |
| PTEN    | R130G   | head and neck | mut.          | resistance or non-response | Taselisib (GDC-0032)            | preclinical  | 26589432               | B3    |
| MTAP    | del.    | breast        | del.          | sensitivity                | 5-Fluoropyrimidine              | preclinical  | 26751376               | B3    |
| PIK3CA  | C420R   | colorectal    | any (GoF)     | response                   | aspirin in adjuvant setting     | late trials  | 23094721               | B2    |
| PTEN    | R130G   | endometrial   | any (LoF)     | response                   | PARP inhibitors                 | case report  | 21468130, 20944090     | B2    |
| PIK3CA  | C420R   | breast        | any (LoF)     | sensitivity                | ATM inhibitor                   | preclinical  | 27397505               | B3    |
|         |         | breast        | mut.          | sensitivity                | AZD-5363                        | clin. trials | 28489509               | B2    |
|         |         | colorectal    | mut.          | sensitivity                | Cabozantinib                    | preclinical  | 25242168               | B3    |
| CDKN2A  | del.    | melanoma      | loss          | sensitivity                | Flavopiridol                    | preclinical  | 12777976               | B3    |
| PTEN    | R130G   | breast        | mut.          | sensitivity                | Ipatasertib                     | preclinical  | 23287563               | B3    |
|         |         | endometrial   | any (LoF)     | no response                | mTOR inhibitors                 | early trials | 21788564, 23238879     | B2    |
| PIK3CA  | C420R   | melanoma      | any (LoF)     | resistance                 | PD1 inhibitors                  | early trials | 26645196               | B2    |
|         |         | endometrial   | mut.          | sensitivity                | Ridaforolimus, Temozolomide     | clin. trials | 24166148               | B2    |
| PTEN    | R130G   | unspecified   | any (LoF)     | response                   | sirolimus                       | early trials | ASCO 2013 (abstr 2532) | B2    |

**Other genes:** here you can find other genes that might be interesting to check (information from Target DB<sup>3</sup> and Meric-Bernstam list<sup>4</sup>). No level information is provided in this section.

[1] "No other genes found"

<sup>3</sup>Van Allen et al., Nat Med (2014), v3

<sup>4</sup>Meric-Bernstam et al., J Natl Cancer Inst (2015)

# MTB Report - From somatic variants to treatment options

Department of Medical Statistics, University Medical Center Goettingen

September 27, 2017

## PATIENT INFORMATION

|                             |                                                                                                                                                                                    |                          |      |
|-----------------------------|------------------------------------------------------------------------------------------------------------------------------------------------------------------------------------|--------------------------|------|
| <b>Patient ID</b>           | MASTER-06                                                                                                                                                                          | <b>Tissue Type</b>       | ?    |
| <b>Gender</b>               | Male                                                                                                                                                                               | <b>Tumor Content (%)</b> | NA   |
| <b>Disease</b>              | Neuroendocrine tumor                                                                                                                                                               | <b>Number SNVs</b>       | 2703 |
| <b>Previous Therapies</b>   | Many chemotherapy cycles                                                                                                                                                           | <b>Number CNVs</b>       | 2114 |
| <b>Tumor Board Decision</b> | mTOR missense mutations: mTOR inhibitor;<br>PTPN12 missense mutation: Lapatinib, er-<br>lotinib; KIT missense mutation: imatinib, de-<br>satinib; LCK missense mutation: desatinib | <b>Number Fusions</b>    | 5    |

## GENE-DRUG PREDICTIVE ASSOCIATIONS

**Method:** Somatic variants of the patient (mutations, amplifications, deletions, rearrangements) are searched in curated databases of predictive biomarkers (GKDB<sup>1</sup>, CIViC<sup>2</sup>) and reported according to their clinical evidence (see Levels of Evidence). In the following two tables (SNVs and CNVs), basic information of the somatic variants with relevant clinical implications can be found:

| Gene    | Patient's Variant | Level of Evidence | Variant Freq. | Zygoty | Quality (Phred) |
|---------|-------------------|-------------------|---------------|--------|-----------------|
| ABL1    | A922T             | B1 ,B2            | 0.09          | het    | 0               |
| APC     | P411S             | B3                | 0.41          | het    | 225             |
| ATM     | V356I             | B2 ,B3            | 1.00          | hom    | 222             |
| CDK12   | E1292K            | B3                | 0.44          | het    | 225             |
| CEBPA   | G272D             | B2                | 0.41          | het    | 225             |
| GNAQ    | X68L              | B2 ,B3            | 0.30          | het    | 225             |
| GNAS    | G35E, A349T       | B3                | 0.41          | het    | 225             |
| JAK1    | E37K              | B2 ,B3            | 0.48          | het    | 225             |
| JAK3    | G442D             | B3                | 0.15          | het    | 6               |
| KIT     | A837T             | B3                | 0.09          | het    | 0               |
| MTOR    | P2490L, G332R     | B2 ,B3            | 0.26          | het    | 189             |
| NF1     | W777X             | B2 ,B3            | 0.31          | het    | 160             |
| NOTCH1  | L590F             | B3                | 0.36          | het    | 171             |
| RAD50   | D478N             | B2                | 0.29          | het    | 190             |
| ROS1    | R201K             | B2 ,B3            | 0.78          | het    | 225             |
| SMAD4   | G510E             | B2                | 0.53          | het    | 225             |
| SMARCA4 | S2F               | B2                | 0.43          | het    | 225             |
| SMO     | P306S             | B2 ,B3            | 0.28          | het    | 81              |
| TSC2    | D1380N            | B2 ,B3            | 0.85          | hom    | 225             |

| Gene   | Patient's Variant | Level of Evidence | Seg. Mean | Size (Mb) |
|--------|-------------------|-------------------|-----------|-----------|
| CDKN2A | del.              | B2 ,B3            | -0.72     | 20.8      |
| CDKN2B | del.              | B3                | -0.72     | 20.8      |
| FBXW7  | del.              | B3                | -0.69     | 42.3      |
| GNAQ   | X68L              | B2 ,B3            | 0.58      | 15.4      |
| MGMT   | del.              | B2                | -0.66     | 45.0      |
| MTAP   | del.              | B3                | -0.72     | 20.8      |
| SYK    | ampl.             | B3                | 0.55      | 4.7       |

**Levels of Evidence:** Findings are classified into 6 levels of evidence combining the **axis A-B** and the **axis 1-2-3**. Level A means evidence in the same cancer type. Level B means evidence in any other cancer type. On the 1-2-3 axis, level 1 means evidence supported by drug approval organizations or clinical guidelines, level 2 contains clinical evidence (clinical trials, case reports) and level 3 consists of preclinical evidence. The distribution of findings into levels is summarized in the right figure

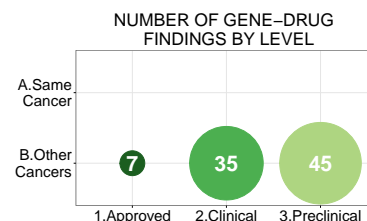

**Table of Results:** All the predictive associations are detailed in this table. The results are sorted by 1) drug frequency, 2) levels of evidence (A1-B1-A2-B2-A3-B3). To allow a quick interpretation, the type of association (response, resistance) is colored (green, red) and new variants are gray and underlined.

| Patient |              | Gene-Drug Associations |               |             |                          |              |                         |       |
|---------|--------------|------------------------|---------------|-------------|--------------------------|--------------|-------------------------|-------|
| Gene    | Variant      | Disease                | Known Variant | Association | Drugs                    | Evidence     | PMID                    | Level |
| NF1     | <u>W777X</u> | neurosarcoma           | any (LoF)     | no response | everolimus + bevacizumab | early trials | ASCO 2016 (abstr 11053) | B2    |

<sup>1</sup>Dienstmann et al., Cancer Discov (2015), v19

<sup>2</sup>Griffith et al., Nat Genet (2017), version 01 June 2017

| Patient |                 | Gene-Drug            |                                          |                   | Associations                       |                 |                                    |       |  |
|---------|-----------------|----------------------|------------------------------------------|-------------------|------------------------------------|-----------------|------------------------------------|-------|--|
| Gene    | Variant         | Disease              | Known Variant                            | Association       | Drugs                              | Evidence        | PMID                               | Level |  |
| MTOR    | P2490L<br>G332R | angiosarcoma         | I1973F,<br>K1771R (GoF)                  | response          | everolimus                         | case report     | ASCO 2015 (abstr 11010),26859683   | B2    |  |
|         |                 | bladder              | E2014K,<br>E2419K,<br>N1421D (GoF)       | response          | everolimus                         | case report     | 24625776,ASCO 2015 (abstr 11010)   | B2    |  |
|         |                 | gastric              | K1771R,<br>N1421D (GoF)                  | response          | everolimus                         | case report     | ASCO 2015 (abstr 11010),26859683   | B2    |  |
|         |                 | renal                | I1973F,<br>Q2223K<br>(GoF)               | response          | everolimus                         | case report     | 26859683,2462246                   | B2    |  |
| NF1     | W777X           | bladder              | mut.                                     | sensitivity       | Everolimus,Pazopanib               | case report     | 24625776                           | B2    |  |
|         |                 | head and neck        | D1644A (LoF)                             | response          | everolimus                         | case report     | 26859683                           | B2    |  |
| TSC2    | D1380N          | hepatocellular       | mut. (LoF)                               | response          | everolimus + pazopanib             | case report     | 24931142                           | B2    |  |
|         |                 | thyroid              | any (LoF)                                | response          | everolimus                         | case report     | 25295501                           | B2    |  |
| CDKN2A  | del.            | gastric              | any (LoF)                                | response          | everolimus                         | case report     | 26859683                           | B2    |  |
|         |                 | breast               | loss                                     | sensitivity       | Letrozole,Palbociclib (PD0332991)  | case report     | 26715889                           | B2    |  |
|         |                 | bone ewing sarcoma   | loss                                     | sensitivity       | Linsitinib,Palbociclib             | preclinical     | 27286459                           | B3    |  |
|         |                 | dermatofibro-sarcoma | loss                                     | sensitivity       | Palbociclib                        | preclinical     | 25852058                           | B3    |  |
|         |                 | ovarian              | loss                                     | sensitivity       | Palbociclib (PD0332991)            | preclinical     | 21278246                           | B3    |  |
|         |                 | renal                | loss                                     | sensitivity       | Palbociclib (PD0332991)            | preclinical     | 23898052                           | B3    |  |
| CDKN2B  | del.            | melanoma             | loss                                     | sensitivity       | Palbociclib (PD0332991)            | preclinical     | 24495407                           | B3    |  |
|         |                 | renal                | loss                                     | sensitivity       | Palbociclib (PD0332991)            | preclinical     | 23898052                           | B3    |  |
| ABL1    | A922T           | bone ewing sarcoma   | loss                                     | sensitivity       | Palbociclib,Linsitinib             | preclinical     | 27286459                           | B3    |  |
|         |                 | CML                  | F359V/C/I,<br>Y253H,<br>E255K/V<br>(GoF) | response          | dasatinib, bosutinib, ponatinib    | NCCN guidelines | 21562040                           | B1    |  |
|         |                 | ALL                  | F359V/C/I,<br>Y253H,<br>E255K/V<br>(GoF) | response          | dasatinib, ponatinib               | NCCN guidelines | NCCN                               | B1    |  |
|         |                 | CML                  | T315A,<br>F317L/V/I/C<br>(GoF)           | response          | nilotinib, bosutinib, ponatinib    | NCCN guidelines | 21562040                           | B1    |  |
|         |                 | ALL                  | T315A,<br>F317L/V/I/C,<br>V299L (GoF)    | response          | nilotinib, ponatinib               | NCCN guidelines | NCCN                               | B1    |  |
|         |                 | CML                  | V299L (GoF)                              | response          | nilotinib, ponatinib               | NCCN guidelines | 21562040                           | B1    |  |
|         |                 | ALL                  | T315I (GoF)                              | response          | ponatinib                          | NCCN guidelines | NCCN                               | B1    |  |
|         |                 | CML                  | T315I (GoF)                              | response          | ponatinib                          | NCCN guidelines | 21562040                           | B1    |  |
| CDKN2A  | del.            | melanoma             | any (LoF)                                | response          | CDK4/6 inhibitors                  | case report     | ASCO 2013 (abstr 2500)             | B2    |  |
|         |                 | unspecified          | any (LoF)                                | sensitivity       | CDK4/6 inhibitors                  | preclinical     | 22471707                           | B3    |  |
|         |                 | glioblastoma         | any (LoF)                                | sensitivity       | CDK4/6 inhibitors                  | preclinical     | 22586120,<br>22711607              | B3    |  |
| CDKN2B  | del.            | unspecified          | any (LoF)                                | sensitivity       | CDK4/6 inhibitors                  | preclinical     | 22471707                           | B3    |  |
|         |                 | glioblastoma         | any (LoF)                                | sensitivity       | CDK4/6 inhibitors                  | preclinical     | 22711607                           | B3    |  |
| TSC2    | D1380N          | angiomyolipoma       | any (LoF)                                | response          | mTOR inhibitors                    | early trials    | 23312829,<br>21525172,<br>20048174 | B2    |  |
| NF1     | W777X           | neurosarcoma         | any (LoF)                                | sensitivity       | mTOR inhibitors                    | preclinical     | 18483311,<br>20505189,<br>24509877 | B3    |  |
|         |                 | neurosarcoma         | any (LoF)                                | sensitivity       | mTOR inhibitors + HSP90 inhibitors | preclinical     | 21907929                           | B3    |  |
| MGMT    | del.            | glioblastoma         | any (LoF)                                | sensitivity       | mTOR inhibitors                    | preclinical     | 19573811                           | B3    |  |
|         |                 | glioblastoma         | any (LoF)                                | increased benefit | temozolomide                       | late trials     | 15758010                           | B2    |  |
| ATM     | V356I           | glioblastoma         | any (LoF)                                | sensitivity       | temozolomide                       | preclinical     | 23960094                           | B3    |  |
|         |                 | glioblastoma         | mut.                                     | sensitivity       | Temozolomide                       | preclinical     | 23960094                           | B3    |  |
|         |                 | melanoma             | mut.                                     | sensitivity       | Temozolomide                       | preclinical     | 23960094                           | B3    |  |

| Patient |               | Gene-Drug                               |                              |                            | Associations                                            |                         |                          |          |    |
|---------|---------------|-----------------------------------------|------------------------------|----------------------------|---------------------------------------------------------|-------------------------|--------------------------|----------|----|
| Gene    | Variant       | Disease                                 | Known Variant                | Association                | Drugs                                                   | Evidence                | PMID                     | Level    |    |
| SMO     | P306S         | basal cell carc.                        | mut.                         | resistance or non-response | Vismodegib                                              | clin. trials            | 25759020                 | B2       |    |
|         |               | basal cell carc.                        | mut.                         | resistance or non-response | Vismodegib,LDE225                                       | clin. trials            | 26546616                 | B2       |    |
|         |               | basal cell carc.                        | G497W, D473Y (GoF)           | resistance                 | vismodegib                                              | case report             | 25306392                 | B2       |    |
|         |               | medulloblastoma                         | D473H (GoF)                  | resistance                 | vismodegib                                              | case report             | 19726788, 25759019       | B2       |    |
| NF1     | W777X         | melanoma                                | any (LoF)                    | resistance                 | selumetinib in BRAF mutant tumors                       | case report             | 23444215, 23288408       | B2       |    |
|         |               | melanoma                                | any (LoF)                    | resistance                 | BRAF inhibitors in BRAF mutant tumor                    | preclinical             | 23288408, 24576830       | B3       |    |
| ATM     | V356I         | prostate                                | any (LoF)                    | response                   | PARP inhibitors                                         | early trials            | 26510020                 | B2       |    |
|         |               | gastric                                 | any (LoF)                    | response                   | PARP inhibitors                                         | early trials            | ENA 2014 (abstr 8LBA)    | B2       |    |
| CDK12   | E1292K        | ovarian                                 | any (LoF)                    | sensitivity                | PARP inhibitors                                         | preclinical             | 24240700, 24554720       | B3       |    |
| FBXW7   | del.          | breast                                  | (LoF)                        | sensitivity                | Rapamycin (Sirolimus)                                   | preclinical             | 18787170                 | B3       |    |
| MTOR    | P2490L G332R  | unspecified                             | L1460P, S2215Y, R2505P (GoF) | sensitivity                | rapamycin                                               | preclinical             | 24631838                 | B3       |    |
| NF1     | W777X         | melanoma                                | mut.                         | sensitivity                | Rapamycin (Sirolimus),PD0325901                         | preclinical             | 23171796                 | B3       |    |
| GNAS    | G35E A349T    | unspecified                             | R201 (GoF)                   | sensitivity                | JAK inhibitors                                          | preclinical             | 21835143                 | B3       |    |
| JAK3    | G442D         | megakaryo. Leuk.                        | R657Q, I87T, Q501H (GoF)     | sensitivity                | JAK inhibitors                                          | preclinical             | 18397343                 | B3       |    |
| GNAQ    | X68L          | melanoma                                | mut.                         | sensitivity                | JQ1                                                     | preclinical             | 26397223                 | B3       |    |
| NF1     | W777X         | malignant peripheral nerve sheath tumor | loss                         | sensitivity                | JQ1 Compound                                            | preclinical             | 24373973                 | B3       |    |
| JAK1    | E37K          | melanoma                                | any (LoF)                    | resistance                 | PD1 blockade                                            | early trials            | ASCO 2016 (abstr 105)    | B2       |    |
|         |               | endometrial                             | any (GoF)                    | response                   | PD1 blockade tensirolimus                               | case report             | 27433843 27016228        | B2       |    |
| TSC2    | D1380N D1380N |                                         |                              |                            |                                                         |                         |                          |          |    |
| GNAQ    | X68L          | melanoma                                | mut.                         | sensitivity                | Trametinib                                              | clin. trials            | 22805292                 | B2       |    |
| NF1     | W777X         | melanoma                                | any (LoF)                    | sensitivity                | trametinib                                              | preclinical             | 24576830                 | B3       |    |
|         |               | melanoma                                | mut.                         | resistance or non-response | Vemurafenib                                             | case report             | 23288408                 | B2       |    |
| MTAP    | del.          | breast                                  | del.                         | sensitivity                | 5-Fluoropyrimidine                                      | preclinical             | 26751376                 | B3       |    |
|         |               | CEBPA                                   | G272D                        | AML                        | mut.                                                    | All-trans Retinoic Acid | clin. trials             | 19965647 | B2 |
| FBXW7   | del.          | unspecified                             | any (LoF)                    | resistance                 | anti-tubulin agents                                     | preclinical             | 21368834                 | B3       |    |
| SMO     | P306S         | basal cell carc.                        | mut.                         | sensitivity                | Arsenic Trioxide,PSI                                    | preclinical             | 25759020                 | B3       |    |
| RAD50   | D478N         | unspecified                             | L1237F (LoF)                 | response                   | irinotecan plus CHK1/2 inhibitor in ATM deficient tumor | case report             | 24934408                 | B2       |    |
| ATM     | V356I         | colorectal                              | any (LoF)                    | response                   | ATR inhibitors                                          | case report             | ENA 2015 (abstract A48)  | B2       |    |
| ABL1    | A922T         | ALL                                     | T315I (GoF)                  | response                   | AURK inhibitors + BCR-ABL1 inhibitors                   | case report             | 22772060                 | B2       |    |
|         |               | ALL                                     | T315I (GoF)                  | response                   | axitinib                                                | case report             | 25686603                 | B2       |    |
| NF1     | W777X         | melanoma                                | mut.                         | sensitivity                | VTX-11e,AZ628                                           | preclinical             | 23288408                 | B3       |    |
| ROS1    | R201K         | lung (adeno)                            | G2032R (GoF)                 | sensitivity                | cabozantinib                                            | preclinical             | 25351743                 | B3       |    |
| SMAD4   | G510E         | colorectal                              | mut.                         | resistance or non-response | Panitumumab,Cetuximab                                   | clin. trials            | 26508446                 | B2       |    |
| ATM     | V356I         | bladder                                 | any (LoF)                    | response                   | cisplatin                                               | early trials            | 26238431                 | B2       |    |
| ROS1    | R201K         | lung (adeno)                            | G2032R (GoF)                 | resistance                 | crizotinib                                              | case report             | 23724914, 25688157       | B2       |    |
| ATM     | V356I         | anaplast. Large-cell lymph.             | any (LoF)                    | sensitivity                | DNA-PKc inhibitors                                      | preclinical             | 23761041                 | B3       |    |
| SMARCA4 | S2F           | ovarian rhabdoid                        | any (LoF)                    | response                   | EZH2 inhibitor                                          | case report             | ESMO 2015 (abstract 302) | B2       |    |
| CDKN2A  | del.          | melanoma                                | loss                         | sensitivity                | Flavopiridol                                            | preclinical             | 12777976                 | B3       |    |
| APC     | P411S         | colorectal                              | mut.                         | sensitivity                | G007-LK                                                 | preclinical             | 23539443                 | B3       |    |
| NOTCH1  | L590F         | mantle cell lymphoma                    | any (GoF)                    | sensitivity                | Gamma secretase inhibitors                              | preclinical             | 22210878                 | B3       |    |



| Patient |         | Gene-Drug         |               |              | Associations |                      |             |                       |       |
|---------|---------|-------------------|---------------|--------------|--------------|----------------------|-------------|-----------------------|-------|
| Gene    | Variant | Disease           | Known Variant | Vari-<br>ant | Association  | Drugs                | Evidence    | PMID                  | Level |
| KIT     | A837T   | gastric (stromal) | mut.          |              | sensitivity  | Pictilisib, Imatinib | preclinical | 23231951              | B3    |
| APC     | P411S   | colorectal        | mut.          |              | sensitivity  | JW55                 | preclinical | 22440753              | B3    |
| NF1     | W777X   | neurosarcoma      | any (LoF)     |              | sensitivity  | MEK inhibitors       | preclinical | 23221341              | B3    |
| ATM     | V356I   |                   | mut.          |              | sensitivity  | Olaparib             | preclinical | 20739657              | B3    |
| JAK1    | E37K    | ALL               | S646F (GoF)   |              | sensitivity  | ruxolitinib          | preclinical | 22955920              | B3    |
| TSC2    | D1380N  | lymphangioma      | any (LoF)     |              | sensitivity  | SRC inhibitors       | preclinical | 24691995              | B3    |
| SYK     | ampl.   | CLL               | ampl. (GoF)   |              | sensitivity  | SYK inhibitors       | preclinical | 16409295,<br>19549911 | B3    |
| APC     | P411S   | colorectal        | any (LoF)     |              | sensitivity  | tankyrase inhibitors | preclinical | 22440753,<br>23539443 | B3    |

**Other genes:** here you can find other genes that might be interesting to check (information from Target DB<sup>3</sup> and Meric-Bernstam list<sup>4</sup>). No level information is provided in this section.

| Patient |         | Drug-Gene Interactions                 |                                                               |                     |
|---------|---------|----------------------------------------|---------------------------------------------------------------|---------------------|
| Gene    | Variant | Known Variant                          | Description                                                   | Drugs               |
| NOTCH3  | L1185F  | Mutation; Amplification; Rearrangement |                                                               | Treatment with GSIs |
| CREBBP  | A237T   | Biallelic Inactivation                 | Biallelic inactivation is Prognostic / Diagnostic in leukemia |                     |

<sup>3</sup>Van Allen et al., Nat Med (2014), v3

<sup>4</sup>Meric-Bernstam et al., J Natl Cancer Inst (2015)

# MTB Report - From somatic variants to treatment options

Department of Medical Statistics, University Medical Center Goettingen

September 27, 2017

## PATIENT INFORMATION

|                             |                                                                                      |                          |     |
|-----------------------------|--------------------------------------------------------------------------------------|--------------------------|-----|
| <b>Patient ID</b>           | MASTER-07                                                                            | <b>Tissue Type</b>       | ?   |
| <b>Gender</b>               | Male                                                                                 | <b>Tumor Content (%)</b> | 70  |
| <b>Disease</b>              | Gastric cardia metastasis IHC: neuroendocrine                                        | <b>Number SNVs</b>       | 657 |
| <b>Previous Therapies</b>   | Chemotherapy                                                                         | <b>Number CNVs</b>       | 425 |
| <b>Tumor Board Decision</b> | ERBB3 amplification, RAF1 missense mutation, MTOR missense mutation : mTOR inhibitor | <b>Number Fusions</b>    | 5   |

## GENE-DRUG PREDICTIVE ASSOCIATIONS

**Method:** Somatic variants of the patient (mutations, amplifications, deletions, rearrangements) are searched in curated databases of predictive biomarkers (GKDB<sup>1</sup>, CIViC<sup>2</sup>) and reported according to their clinical evidence (see Levels of Evidence). In the following two tables (SNVs and CNVs), basic information of the somatic variants with relevant clinical implications can be found:

| Gene   | Patient's Variant | Level of Evidence | Variant Freq. | Zygoty | Quality (Phred) |
|--------|-------------------|-------------------|---------------|--------|-----------------|
| AR     | A417V             | B2 ,B3            | 0.53          | het    | 131             |
| ARID1A | G1450fs           | B2 ,B3            | 0.00          | NA     | 2962            |
| ERBB3  | V104M             | B2 ,B3            | 0.37          | het    | 225             |
| MTOR   | E1485G            | A2 ,B2 ,B3        | 0.20          | het    | 27              |
| PBRM1  | 1092-1092del      | B3                | 0.00          | NA     | 2958            |
| RAF1   | S259P             | B3                | 0.22          | het    | 136             |
| RUNX1  | A329T             | B2                | 0.31          | het    | 167             |
| TP53   | R175H             | A2 ,B2 ,B3        | 0.39          | het    | 225             |

| Gene  | Patient's Variant | Level of Evidence | Seg. Mean | Size (Mb) |
|-------|-------------------|-------------------|-----------|-----------|
| CDK4  | ampl.             | B2                | 0.99      | 3.1       |
| ERBB3 | V104M,ampl.       | B2 ,B3            | 0.99      | 3.1       |

**Levels of Evidence:** Findings are classified into 6 levels of evidence combining the axis A-B and the axis 1-2-3. Level A means evidence in the same cancer type. Level B means evidence in any other cancer type. On the 1-2-3 axis, level 1 means evidence supported by drug approval organizations or clinical guidelines, level 2 contains clinical evidence (clinical trials, case reports) and level 3 consists of preclinical evidence. The distribution of findings into levels is summarized in the right figure

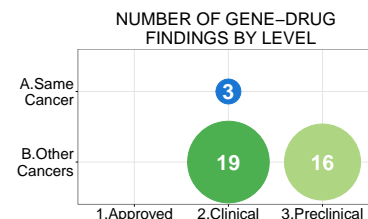

**Table of Results:** All the predictive associations are detailed in this table. The results are sorted by 1) drug frequency, 2) levels of evidence (A1-B1-A2-B2-A3-B3). To allow a quick interpretation, the type of association (response, resistance) is colored (green, red) and new variants are gray and underlined>.

| Patient |         | Gene-Drug    |                              | Associations |                      | Evidence     | PMID                             | Level |
|---------|---------|--------------|------------------------------|--------------|----------------------|--------------|----------------------------------|-------|
| Gene    | Variant | Disease      | Known Variant                | Association  | Drugs                |              |                                  |       |
| MTOR    | E1485G  | gastric      | K1771R, N1421D (GoF)         | response     | everolimus           | case report  | ASCO 2015 (abstr 11010),26859683 | A2    |
|         |         | angiosarcoma | I1973F, K1771R (GoF)         | response     | everolimus           | case report  | ASCO 2015 (abstr 11010),26859683 | B2    |
|         |         | bladder      | E2014K, E2419K, N1421D (GoF) | response     | everolimus           | case report  | 24625776,ASCO 2015 (abstr 11010) | B2    |
|         |         | renal        | I1973F, Q2223K (GoF)         | response     | everolimus           | case report  | 26859683,2462246                 | B2    |
|         |         | bladder      | mut.                         | sensitivity  | Everolimus,Pazopanib | case report  | 24625776                         | B2    |
| ERBB3   | V104M   | bladder      | V104M, R103G, G284R          | sensitivity  | Afatinib             | clin. trials | 27044931                         | B2    |
|         |         | bladder      | G284R, V104M, R103G (GoF)    | response     | afatinib             | case report  | 27044931                         | B2    |
|         |         | bladder      | G284R, R103G (GoF)           | response     | afatinib             | case report  | ASCO 2015 (abstr e15516)         | B2    |
|         |         | bladder      | G284R, R103G (GoF)           | response     | afatinib             | case report  | ASCO 2015 (abstr e15516)         | B2    |

<sup>1</sup>Dienstmann et al., Cancer Discov (2015), v19

<sup>2</sup>Griffith et al., Nat Genet (2017), version 01 June 2017

| Patient |              | Gene-Drug       |                                         |                            | Associations                                                                                 |              |                       |       |  |
|---------|--------------|-----------------|-----------------------------------------|----------------------------|----------------------------------------------------------------------------------------------|--------------|-----------------------|-------|--|
| Gene    | Variant      | Disease         | Known Variant                           | Association                | Drugs                                                                                        | Evidence     | PMID                  | Level |  |
| ARID1A  | G1450fs      | ovarian         | any (LoF)                               | sensitivity                | EZH2 inhibitor                                                                               | preclinical  | 25686104              | B3    |  |
|         |              | unspecified     | mut. (LoF)                              | sensitivity                | EZH2 inhibitors in RAS wt                                                                    | preclinical  | 26552009              | B3    |  |
| PBRM1   | 1092-1092del | unspecified     | any (LoF)                               | sensitivity                | EZH2 inhibitor in RAS wt                                                                     | preclinical  | 26552009              | B3    |  |
| ARID1A  | G1450fs      | breast          | mut. (LoF)                              | resistance                 | trastuzumab (ANXA1 high)                                                                     | early trials | 27172896              | B2    |  |
| ERBB3   | V104M        | unspecified     | Q809R (GoF)                             | sensitivity                | trastuzumab, lapatinib, PI3K pathway inhibitors + MEK inhibitors                             | preclinical  | 23680147              | B3    |  |
|         |              | unspecified     | P262H, G284R (GoF)                      | sensitivity                | trastuzumab, pertuzumab, lapatinib, anti-HER3 mAbs, PI3K pathway inhibitors + MEK inhibitors | preclinical  | 23680147              | B3    |  |
| RAF1    | S259P        | melanoma        | S257P, P261P, G361A (GoF)               | resistance                 | BRAF inhibitors in BRAF mutant tumors                                                        | preclinical  | 23737487              | B3    |  |
| TP53    | R175H        | AML             | mut. (LoF)                              | response                   | decitabine                                                                                   | early trials | 27959731              | B2    |  |
|         |              | MDS             | mut. (LoF)                              | response                   | decitabine                                                                                   | early trials | 27959731              | B2    |  |
|         |              | lung            | mut.                                    | resistance or non-response | Docetaxel                                                                                    | preclinical  | 22425996              | B3    |  |
|         |              | lung            | mut.                                    | sensitivity                | Docetaxel, Selumetinib (AZD6244)                                                             | preclinical  | 22425996              | B3    |  |
|         |              | bladder         | mut. (LoF)                              | sensitivity                | mitomycin C, gemcitabine, doxorubicin                                                        | preclinical  | 27397505              | B3    |  |
|         |              | breast          | R175H, mut.                             | sensitivity                | Doxorubicin                                                                                  | preclinical  | 22698404              | B3    |  |
|         |              | ovarian         | any (GoF)                               | response                   | WEE1 inhibitors + carboplatin                                                                | early trials | ASCO2015 (abstr 2507) | B2    |  |
|         |              | head and neck   | any (LoF)                               | sensitivity                | WEE1 inhibitors                                                                              | preclinical  | 25125259              | B3    |  |
|         |              | breast          | mut. (LoF)                              | resistance                 | CDK4/CDK6 inhibitor abemaciclib                                                              | early trials | 27217383              | B2    |  |
| AR      | A417V        | prostate        | mut.                                    | resistance or non-response | Flutamide, Nilutamide, Bicalutamide, Cyproterone Acetate                                     | clin. trials | 26000489              | B2    |  |
| TP53    | R175H        | CLL             | mut.                                    | sensitivity                | Alemtuzumab                                                                                  | clin. trials | 14726385              | B2    |  |
| ERBB3   | ampl.        | colorectal      | ampl. (GoF)                             | resistance                 | anti-EGFR mAbs                                                                               | early trials | 25520391              | B2    |  |
| CDK4    | ampl.        | liposarcoma     | ampl. (GoF)                             | response                   | CDK4 inhibitors (tumors with RB expression)                                                  | early trials | 23569312              | B2    |  |
| TP53    | R175H        | gastric         | mut.                                    | sensitivity                | Chemotherapy                                                                                 | clin. trials | 24740294              | A2    |  |
|         |              |                 | mut. (LoF)                              | resistance                 | cisplatin                                                                                    | early trials | 27646943              | B2    |  |
| RUNX1   | A329T        | AML             | mut.                                    | resistance or non-response | Cytarabine                                                                                   | clin. trials | 21343560              | B2    |  |
| TP53    | R175H        | gastric         | R273C, Y220C, R175H, R282L, R213P, mut. | sensitivity                | EAP Protocol                                                                                 | case report  | 14514923              | A2    |  |
| AR      | A417V        | prostate        | F877L/T878A coexisting (GoF)            | sensitivity                | enzalutamide                                                                                 | preclinical  | 27196756              | B3    |  |
| TP53    | R175H        | unspecified     | R248Q, R175H (GoF)                      | sensitivity                | HSP90 inhibitors                                                                             | preclinical  | 26009011              | B3    |  |
| ARID1A  | G1450fs      | unspecified     | mut. (LoF)                              | sensitivity                | PARP inhibitors                                                                              | preclinical  | 26069190              | B3    |  |
| CDK4    | ampl.        | liposarcoma     | ampl.                                   | sensitivity                | PD0332991                                                                                    | clin. trials | 23569312              | B2    |  |
| TP53    | R175H        | thymic lymphoma | any (LoF)                               | sensitivity                | pramlintide                                                                                  | preclinical  | 25409149              | B3    |  |
| MTOR    | E1485G       | unspecified     | L1460P, S2215Y, R2505P (GoF)            | sensitivity                | rapamycin                                                                                    | preclinical  | 24631838              | B3    |  |

**Other genes:** here you can find other genes that might be interesting to check (information from Target DB<sup>3</sup> and Meric-Bernstam list<sup>4</sup>). No level information is provided in this section.

| Patient |         | Drug-Gene Interactions  |             |                               |
|---------|---------|-------------------------|-------------|-------------------------------|
| Gene    | Variant | Known Variant           | Description | Drugs                         |
| MAP3K4  | T1055M  | Mutation; Amplification |             | Treatment with JNK1 inhibitor |
| MAPK8   | E1103K  | Mutation; Amplification |             | Treatment with JNK1 inhibitor |

<sup>3</sup>Van Allen et al., Nat Med (2014), v3

<sup>4</sup>Meric-Bernstam et al., J Natl Cancer Inst (2015)



# MTB Report - From somatic variants to treatment options

Department of Medical Statistics, University Medical Center Goettingen

September 27, 2017

## PATIENT INFORMATION

|                             |                                                                                   |                          |      |
|-----------------------------|-----------------------------------------------------------------------------------|--------------------------|------|
| <b>Patient ID</b>           | MASTER-08                                                                         | <b>Tissue Type</b>       | ?    |
| <b>Gender</b>               | Male                                                                              | <b>Tumor Content (%)</b> | 60   |
| <b>Disease</b>              | metastasis cholangiocarcinoma                                                     | <b>Number SNVs</b>       | 28   |
| <b>Previous Therapies</b>   | Erlotinib                                                                         | <b>Number CNVs</b>       | 1011 |
| <b>Tumor Board Decision</b> | ERRFI1 stopgain is promising<br>(EGFR/ERBB2-4 negative regulation) :<br>Erlotinib | <b>Number Fusions</b>    | 1    |

## GENE-DRUG PREDICTIVE ASSOCIATIONS

**Method:** Somatic variants of the patient (mutations, amplifications, deletions, rearrangements) are searched in curated databases of predictive biomarkers (GKDB<sup>1</sup>, CIViC<sup>2</sup>) and reported according to their clinical evidence (see Levels of Evidence). In the following two tables (SNVs and CNVs), basic information of the somatic variants with relevant clinical implications can be found:

| Gene   | Patient's Variant | Level of Evidence | Variant Freq. | Zygoty | Quality (Phred) |
|--------|-------------------|-------------------|---------------|--------|-----------------|
| ARID1A | R1276X            | B2 ,B3            | 0.31          | het    | 225             |

| Gene  | Patient's Variant | Level of Evidence | Seg. Mean | Size (Mb) |
|-------|-------------------|-------------------|-----------|-----------|
| FGFR1 | ampl.             | B2 ,B3            | 0.68      | 38.4      |
| MCL1  | ampl.             | B3                | 0.79      | 19.8      |

**Levels of Evidence:** Findings are classified into 6 levels of evidence combining the **axis A-B** and the **axis 1-2-3**. Level A means evidence in the same cancer type. Level B means evidence in any other cancer type. On the 1-2-3 axis, level 1 means evidence supported by drug approval organizations or clinical guidelines, level 2 contains clinical evidence (clinical trials, case reports) and level 3 consists of preclinical evidence. The distribution of findings into levels is summarized in the right figure

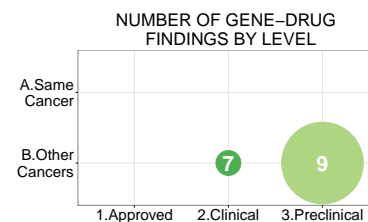

**Table of Results:** All the predictive associations are detailed in this table. The results are sorted by 1) drug frequency, 2) levels of evidence (A1-B1-A2-B2-A3-B3). To allow a quick interpretation, the type of association (response, resistance) is colored (green, red) and new variants are gray and underlined.

| Patient |         | Gene-Drug          |               |                            | Associations              |              |                                                          |             |          |
|---------|---------|--------------------|---------------|----------------------------|---------------------------|--------------|----------------------------------------------------------|-------------|----------|
| Gene    | Variant | Disease            | Known Variant | Association                | Drugs                     | Evidence     | PMID                                                     | Level       |          |
| FGFR1   | ampl.   | breast             | ampl.         | sensitivity                | BGJ-398                   | clin. trials | 27870574                                                 | B2          |          |
|         |         | bladder            | ampl.         | sensitivity                | BGJ-398                   | case report  | 27870574                                                 | B2          |          |
| ARID1A  | R1276X  | ovarian            | any (LoF)     | sensitivity                | EZH2 inhibitor            | preclinical  | 25686104                                                 | B3          |          |
|         |         | unspecified        | mut. (LoF)    | sensitivity                | EZH2 inhibitors in RAS wt | preclinical  | 26552009                                                 | B3          |          |
| FGFR1   | ampl.   | lung (squa.)       | ampl. (GoF)   | response                   | FGFR inhibitors           | early trials | AACR 2012 (abstract LB-122), AACR 2013 (abstract LB-145) | B2          |          |
|         |         |                    |               |                            |                           |              | breast                                                   | ampl. (GoF) | response |
|         |         | lung               | ampl.         | sensitivity                | PD173074                  | preclinical  | 21160078                                                 | B3          |          |
|         |         | lung               | ampl.         | sensitivity                | PD173074                  | preclinical  | 21666749                                                 | B3          |          |
|         |         | bone ewing sarcoma | ampl.         | sensitivity                | Ponatinib                 | preclinical  | 26179511                                                 | B3          |          |
|         |         | breast             | ampl.         | sensitivity                | Ponatinib                 | preclinical  | 22238366                                                 | B3          |          |
|         |         | breast             | ampl.         | resistance or non-response | 4-hydroxytamoxifen        | preclinical  | 20179196                                                 | B3          |          |
|         |         | unspecified        | ampl. (GoF)   | resistance                 | anti-tubulin agents       | preclinical  | 21368834                                                 | B3          |          |
|         |         | breast             | mut. (LoF)    | resistance                 | trastuzumab (ANXA1 high)  | early trials | 27172896                                                 | B2          |          |
|         |         | breast             | ampl.         | sensitivity                | BGJ398                    | clin. trials | 27870574                                                 | B2          |          |
| ARID1A  | R1276X  | unspecified        | mut. (LoF)    | sensitivity                | PARP inhibitors           | preclinical  | 23658459                                                 | B2          |          |
|         |         |                    |               |                            |                           |              | 26069190                                                 | B3          |          |

**Other genes:** here you can find other genes that might be interesting to check (information)

<sup>1</sup>Dienstmann et al., Cancer Discov (2015), v19

<sup>2</sup>Griffith et al., Nat Genet (2017), version 01 June 2017

from Target DB<sup>3</sup> and Meric-Bernstam list<sup>4</sup>). No level information is provided in this section.

| <b>Patient</b> |                | <b>Drug-Gene Interactions</b> |                                                     |                                       |
|----------------|----------------|-------------------------------|-----------------------------------------------------|---------------------------------------|
| <b>Gene</b>    | <b>Variant</b> | <b>Known Variant</b>          | <b>Description</b>                                  | <b>Drugs</b>                          |
| ERRFI1         | R199X          | Biallelic Inactivation        | Deletion may predict sensitivity to EGFR inhibitors | Erlotinib, Gefitinib, EGFR Inhibitors |

<sup>3</sup>Van Allen et al., Nat Med (2014), v3

<sup>4</sup>Meric-Bernstam et al., J Natl Cancer Inst (2015)

# MTB Report - From somatic variants to treatment options

Department of Medical Statistics, University Medical Center Goettingen

September 27, 2017

## PATIENT INFORMATION

|                             |                                                     |                          |    |
|-----------------------------|-----------------------------------------------------|--------------------------|----|
| <b>Patient ID</b>           | MASTER-09                                           | <b>Tissue Type</b>       | ?  |
| <b>Gender</b>               | Female                                              | <b>Tumor Content (%)</b> | NA |
| <b>Disease</b>              | Clear cell sarcoma, bone metastasis                 | <b>Number SNVs</b>       | 11 |
| <b>Previous Therapies</b>   | -                                                   | <b>Number CNVs</b>       | 1  |
| <b>Tumor Board Decision</b> | NTRK3 nissense mutation: lestaurtinib, mi-dostaurin | <b>Number Fusions</b>    | 20 |

## GENE-DRUG PREDICTIVE ASSOCIATIONS

**Method:** Somatic variants of the patient (mutations, amplifications, deletions, rearrangements) are searched in curated databases of predictive biomarkers (GKDB<sup>1</sup>, CIViC<sup>2</sup>) and reported according to their clinical evidence (see Levels of Evidence). In the following two tables (SNVs and CNVs), basic information of the somatic variants with relevant clinical implications can be found:

**Levels of Evidence:** Findings are classified into 6 levels of evidence combining the **axis A-B** and the **axis 1-2-3**. Level A means evidence in the same cancer type. Level B means evidence in any other cancer type. On the 1-2-3 axis, level 1 means evidence supported by drug approval organizations or clinical guidelines, level 2 contains clinical evidence (clinical trials, case reports) and level 3 consists of preclinical evidence. The distribution of findings into levels is summarized in the right figure

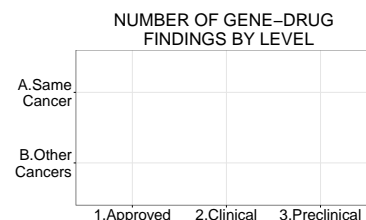

**Table of Results:** All the predictive associations are detailed in this table. The results are sorted by 1) drug frequency, 2) levels of evidence (A1-B1-A2-B2-A3-B3). To allow a quick interpretation, the type of association (response, resistance) is colored (green, red) and new variants are gray and underlined.

**Other genes:** here you can find other genes that might be interesting to check (information from Target DB<sup>3</sup> and Meric-Bernstam list<sup>4</sup>). No level information is provided in this section.

| Patient |              | Drug-Gene Interactions  |                                                                  |               |
|---------|--------------|-------------------------|------------------------------------------------------------------|---------------|
| Gene    | Variant      | Known Variant           | Description                                                      | Drugs         |
| RARA    | F189S        | Rearrangement; mutation | Transloactions predict sensitivity to ATRA and arsenic           | ATRA, Arsenic |
| EWSR1   | EWSR1 fusion | Rearrangement           | Diagnostic in Ewing sarcoma                                      |               |
| RUNX1   | RUNX1 fusion | Rearrangement           | May be prognostic / diagnostic in some hematologic malignancies. |               |

<sup>1</sup>Dienstmann et al., Cancer Discov (2015), v19

<sup>2</sup>Griffith et al., Nat Genet (2017), version 01 June 2017

<sup>3</sup>Van Allen et al., Nat Med (2014), v3

<sup>4</sup>Meric-Bernstam et al., J Natl Cancer Inst (2015)

# MTB Report - From somatic variants to treatment options

Department of Medical Statistics, University Medical Center Goettingen

September 28, 2017

## PATIENT INFORMATION

|                             |                                                                                                                                 |                          |    |
|-----------------------------|---------------------------------------------------------------------------------------------------------------------------------|--------------------------|----|
| <b>Patient ID</b>           | MASTER-10                                                                                                                       | <b>Tissue Type</b>       | ?  |
| <b>Gender</b>               | Male                                                                                                                            | <b>Tumor Content (%)</b> | 70 |
| <b>Disease</b>              | Urothelial carcinoma. Neu spine tumors, and lungs                                                                               | <b>Number SNVs</b>       | 7  |
| <b>Previous Therapies</b>   | -                                                                                                                               | <b>Number CNVs</b>       | 5  |
| <b>Tumor Board Decision</b> | BRAF + HRAS missense mutations : MEK-Inhibitor against risk of paradoxical activation of ERK after BRAF-inhibitors or Sorafenib | <b>Number Fusions</b>    | 1  |

## GENE-DRUG PREDICTIVE ASSOCIATIONS

**Method:** Somatic variants of the patient (mutations, amplifications, deletions, rearrangements) are searched in curated databases of predictive biomarkers (GKDB<sup>1</sup>, CIViC<sup>2</sup>) and reported according to their clinical evidence (see Levels of Evidence). In the following two tables (SNVs and CNVs), basic information of the somatic variants with relevant clinical implications can be found:

| Gene | Patient's Variant | Level of Evidence | Variant Freq. | Zygoty | Quality (Phred) |
|------|-------------------|-------------------|---------------|--------|-----------------|
| BRAF | F595L             | B2,B3             | 0.11          | het    | 57              |
| HRAS | Q61R              | B2,B3             | 0.08          | het    | 0               |
| RAC1 | D63N              | B2                | 0.04          | het    | 0               |

| Gene | Patient's Variant | Level of Evidence | Seg. Mean | Size (Mb) |
|------|-------------------|-------------------|-----------|-----------|
|------|-------------------|-------------------|-----------|-----------|

**Levels of Evidence:** Findings are classified into 6 levels of evidence combining the **axis A-B** and the **axis 1-2-3**. Level A means evidence in the same cancer type. Level B means evidence in any other cancer type. On the 1-2-3 axis, level 1 means evidence supported by drug approval organizations or clinical guidelines, level 2 contains clinical evidence (clinical trials, case reports) and level 3 consists of preclinical evidence. The distribution of findings into levels is summarized in the right figure

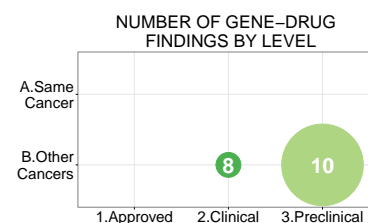

**Table of Results:** All the predictive associations are detailed in this table. The results are sorted by 1) drug frequency, 2) levels of evidence (A1-B1-A2-B2-A3-B3). To allow a quick interpretation, the type of association (response, resistance) is colored (green, red) and new variants are gray and underlined.

| Patient | Gene-Drug |              | Associations                  |                            | Evidence                                                                    |              | PMID               | Level |
|---------|-----------|--------------|-------------------------------|----------------------------|-----------------------------------------------------------------------------|--------------|--------------------|-------|
| Gene    | Variant   | Disease      | Known Variant                 | Association                | Drugs                                                                       | Evidence     | PMID               | Level |
| BRAF    | F595L     | melanoma     | K601R (GoF)                   | response                   | MEK inhibitors                                                              | case report  | 23248257           | B2    |
|         |           | melanoma     | L597R (GoF)                   | response                   | trametinib, MEK inhibitors                                                  | case report  | 22805292, 22798288 | B2    |
|         |           | lung (adeno) | G469A (GoF)                   | sensitivity                | EGFR TKIs + MEK inhibitors in EGFR mutant                                   | preclinical  | 22773810           | B3    |
| HRAS    | Q61R      | AML          | any (GoF)                     | sensitivity                | MEK inhibitors +/- mTOR inhibitors                                          | preclinical  | 22399013, 22507781 | B3    |
|         |           | cervical     | any (GoF)                     | sensitivity                | PI3K pathway inhibitors + MEK inhibitors                                    | preclinical  | 15950068           | B3    |
|         |           | breast       | mut.                          | sensitivity                | Selumetinib (AZD6244), Binimetinib (MEK162), PD0325901, Everolimus, AZD8055 | preclinical  | 26544513           | B3    |
| BRAF    | F595L     | melanoma     | L597R (GoF)                   | response                   | BRAF inhibitors                                                             | case report  | 23715574           | B2    |
| RAC1    | D63N      | melanoma     | P29S (GoF)                    | resistance                 | BRAF inhibitors in BRAF mutant tumors                                       | case report  | 25056119           | B2    |
| BRAF    | F595L     | lung (adeno) | G469A (GoF)                   | resistance                 | EGFR TKIs                                                                   | case report  | 22773810           | B2    |
|         |           | colorectal   | mut.                          | sensitivity                | Cetuximab, Panitumumab                                                      | clin. trials | 25673558           | B2    |
|         |           | colorectal   | mut.                          | resistance or non-response | Cetuximab                                                                   | preclinical  | 22586653           | B3    |
|         |           | lung (adeno) | Y472C reduced kinase activity | response                   | dasatinib                                                                   | case report  | 22649091           | B2    |
|         |           | lung (adeno) | G466V reduced kinase activity | sensitivity                | dasatinib                                                                   | preclinical  | 22649091           | B3    |
| HRAS    | Q61R      | cervical     | any (GoF)                     | sensitivity                | mTOR inhibitors                                                             | preclinical  | 22345164           | B3    |
| BRAF    | F595L     | melanoma     | D594G (GoF) (low activity)    | sensitivity                | sorafenib                                                                   | preclinical  | 18794803           | B3    |

<sup>1</sup>Dienstmann et al., Cancer Discov (2015), v19

<sup>2</sup>Griffith et al., Nat Genet (2017), version 01 June 2017



| Patient |         | Gene-Drug   |                               |             | Associations |              |             |       |
|---------|---------|-------------|-------------------------------|-------------|--------------|--------------|-------------|-------|
| Gene    | Variant | Disease     | Known Variant                 | Association | Drugs        | Evidence     | PMID        | Level |
| HRAS    | Q61R    | melanoma    | G469E (GoF)<br>(low activity) | sensitivity | sorafenib    | preclinical  | 18794803    | B3    |
|         |         | breast      | mut.                          | sensitivity | Trametinib   | preclinical  | 22169769    | B3    |
|         |         | unspecified | any (GoF)                     | sensitivity | tipifarnib   | early trials | NCT02383927 | B2    |

**Other genes:** here you can find other genes that might be interesting to check (information from Target DB<sup>3</sup> and Meric-Bernstam list<sup>4</sup>). No level information is provided in this section.

[1] "No other genes found"

<sup>3</sup>Van Allen et al., Nat Med (2014), v3

<sup>4</sup>Meric-Bernstam et al., J Natl Cancer Inst (2015)

# MTB Report - From somatic variants to treatment options

Department of Medical Statistics, University Medical Center Goettingen

September 27, 2017

## PATIENT INFORMATION

|                             |                                           |                          |     |
|-----------------------------|-------------------------------------------|--------------------------|-----|
| <b>Patient ID</b>           | MASTER-11                                 | <b>Tissue Type</b>       | ?   |
| <b>Gender</b>               | Female                                    | <b>Tumor Content (%)</b> | 80  |
| <b>Disease</b>              | Adeno-CUP (from Pulmonary Adenocarcinoma) | <b>Number SNVs</b>       | 70  |
| <b>Previous Therapies</b>   | -                                         | <b>Number CNVs</b>       | 133 |
| <b>Tumor Board Decision</b> | EGFR p.745-750del: Erlotinib              | <b>Number Fusions</b>    | 1   |

## GENE-DRUG PREDICTIVE ASSOCIATIONS

**Method:** Somatic variants of the patient (mutations, amplifications, deletions, rearrangements) are searched in curated databases of predictive biomarkers (GKDB<sup>1</sup>, CIViC<sup>2</sup>) and reported according to their clinical evidence (see Levels of Evidence). In the following two tables (SNVs and CNVs), basic information of the somatic variants with relevant clinical implications can be found:

| Gene | Patient's Variant | Level of Evidence | Variant Freq. | Zygoty | Quality (Phred) |
|------|-------------------|-------------------|---------------|--------|-----------------|
| ABL1 | D233N             | <b>B1 ,B2</b>     | 0.09          | het    | 0               |
| ATM  | A749V             | <b>B2 ,B3</b>     | 0.07          | het    | 0               |
| EGFR | 745-750del        | <b>B1 ,B2 ,B3</b> | 0.40          | het    | 2927            |

| Gene  | Patient's Variant | Level of Evidence | Seg. Mean | Size (Mb) |
|-------|-------------------|-------------------|-----------|-----------|
| CDK6  | ampl.             | <b>B3</b>         | 2.07      | 1.6       |
| EGFR  | 745-750del,ampl.  | <b>B1 ,B2 ,B3</b> | 0.93      | 2.2       |
| FOXA1 | ampl.             | <b>B3</b>         | 2.81      | 3.6       |
| MYC   | ampl.             | <b>B3</b>         | 0.85      | 0.8       |

**Levels of Evidence:** Findings are classified into 6 levels of evidence combining the **axis A-B** and the **axis 1-2-3**. Level A means evidence in the same cancer type. Level B means evidence in any other cancer type. On the 1-2-3 axis, level 1 means evidence supported by drug approval organizations or clinical guidelines, level 2 contains clinical evidence (clinical trials, case reports) and level 3 consists of preclinical evidence. The distribution of findings into levels is summarized in the right figure

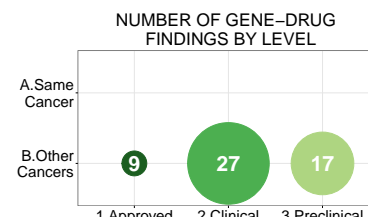

**Table of Results:** All the predictive associations are detailed in this table. The results are sorted by 1) drug frequency, 2) levels of evidence (A1-B1-A2-B2-A3-B3). To allow a quick interpretation, the type of association (response, resistance) is colored (green, red) and new variants are gray and underlined.

| Patient |            | Disease | Known Variant                   | Gene-Drug Associations |                                 | Evidence        | PMID     | Level     |
|---------|------------|---------|---------------------------------|------------------------|---------------------------------|-----------------|----------|-----------|
| Gene    | Variant    |         |                                 | Association            | Drugs                           |                 |          |           |
| ABL1    | D233N      | CML     | F359V/C/I, Y253H, E255K/V (GoF) | response               | dasatinib, bosutinib, ponatinib | NCCN guidelines | 21562040 | <b>B1</b> |
|         |            | ALL     | F359V/C/I, Y253H, E255K/V (GoF) | response               | dasatinib, ponatinib            | NCCN guidelines | NCCN     | <b>B1</b> |
|         |            | CML     | T315A, F317L/V/I/C (GoF)        | response               | nilotinib, bosutinib, ponatinib | NCCN guidelines | 21562040 | <b>B1</b> |
|         |            | ALL     | T315A, F317L/V/I/C, V299L (GoF) | response               | nilotinib, ponatinib            | NCCN guidelines | NCCN     | <b>B1</b> |
|         |            | CML     | V299L (GoF)                     | response               | nilotinib, ponatinib            | NCCN guidelines | 21562040 | <b>B1</b> |
|         |            | ALL     | T315I (GoF)                     | response               | ponatinib                       | NCCN guidelines | NCCN     | <b>B1</b> |
|         |            | CML     | T315I (GoF)                     | response               | ponatinib                       | NCCN guidelines | 21562040 | <b>B1</b> |
| EGFR    | 745-750del | lung    | exon 19 p.729-761 (GoF)         | response               | erlotinib, afatinib             | NCCN guidelines | 22190593 | <b>B1</b> |
|         |            | lung    | exon 19 p.729-761 (GoF)         | response               | erlotinib, afatinib, gefitinib  | FDA-approved    | FDA      | <b>B1</b> |

<sup>1</sup>Dienstmann et al., Cancer Discov (2015), v19

<sup>2</sup>Griffith et al., Nat Genet (2017), version 01 June 2017

| Patient |            | Gene-Drug                                        |                                 |                                              | Associations                                             |                                                 |                                     |             |  |
|---------|------------|--------------------------------------------------|---------------------------------|----------------------------------------------|----------------------------------------------------------|-------------------------------------------------|-------------------------------------|-------------|--|
| Gene    | Variant    | Disease                                          | Known Variant                   | Association                                  | Drugs                                                    | Evidence                                        | PMID                                | Level       |  |
|         |            | lung                                             | exon 19 p.729-761 (GoF)         | response                                     | afatinib                                                 | late trials                                     | 22753918, 25589191                  | B2          |  |
|         |            | lung                                             | mut.                            | sensitivity                                  | Afatinib                                                 | clin. trials                                    | 27083334                            | B2          |  |
|         |            | lung                                             | exon 19 p.729-761 (GoF)         | response                                     | afatinib + cetuximab                                     | early trials                                    | ESMO 2012 (abstr 1289)              | B2          |  |
|         |            | lung                                             | exon 19 p.729-761 (GoF)         | response                                     | afatinib + cetuximab                                     | early trials                                    | ESMO 2012 (abstr 1289)              | B2          |  |
|         |            | colorectal                                       | ampl., expres- sion             | sensitivity                                  | Cetuximab                                                | clin. trials                                    | 18794099,18003960,14993230          | B2          |  |
|         |            | colorectal head and neck                         | ampl. ampl.                     | sensitivity sensitivity                      | Panitumumab,Cetuximab PLATINUM,Cetuximab,5- fluorouracil | clin. trials clin. trials                       | 24653627 21048039                   | B2 B2       |  |
|         |            | lung                                             | L858R, ampl., G719S             | sensitivity                                  | Gefitinib,Erlotinib                                      | clin. trials                                    | 24457318,26722081,26124334          | B2          |  |
|         |            | lung                                             | ampl. (GoF)                     | no response                                  | erlotinib                                                | early trials                                    | ASCO 2015 (abstr e19028)            | B2          |  |
|         |            | lung                                             | V769-770insASV (GoF)            | response                                     | erlotinib                                                | case report                                     | 26773740, 23328547                  | B2          |  |
|         |            | esophageal head and neck                         | ampl. (GoF) ampl. (GoF)         | response no response                         | gefitinib gefitinib                                      | late trials early trials                        | 24950987 21274259, 22261807         | B2 B2       |  |
|         |            | head and neck                                    | delL747- P753insS (GoF)         | no response                                  | gefitinib                                                | case report                                     | 21274259                            | B2          |  |
|         |            | lung                                             | exon 19 p.729-761 (GoF)         | response                                     | irreversible EGFR TKIs                                   | late trials                                     | 22753918                            | B2          |  |
|         |            | lung                                             | exon 20 p.762-823 (GoF)         | decreased sen- sitivity                      | first-generation and irre- versible EGFR TKIs            | late trials                                     | 21764376, 26773740, 26051236        | B2          |  |
|         |            | colorectal                                       | ampl. (GoF)                     | response                                     | anti-EGFR mAbs                                           | late trials                                     | 18794099, 17664472                  | B2          |  |
|         |            | lung                                             | overexpression, ampl.           | sensitivity                                  | EGFR Inhibitor                                           | clin. trials                                    | 22056021,26439801,20826716          | B2          |  |
|         |            | head and neck glioblastoma glioblastoma melanoma | ampl. (GoF) any (LoF) mut. mut. | response sensitivity sensitivity sensitivity | EGFR inhibitors temozolomide Temozolomide Temozolomide   | case report preclinical preclinical preclinical | 26763254 23960094 23960094 23960094 | B2 B3 B3 B3 |  |
| ATM     | A749V      | colorectal                                       | ampl. (GoF)                     | sensitivity                                  | temozolomide                                             | preclinical                                     | 27397505                            | B3          |  |
| MYC     | ampl.      | lung                                             | exon 19 p.729-761 (GoF)         | response                                     | HSP90 inhibitors                                         | early trials                                    | ESMO 2012 (abstr 4380)              | B2          |  |
| EGFR    | 745-750del | lung                                             | exon 19 p.729-761 (GoF)         | response                                     | HSP90 inhibitors                                         | early trials                                    | ESMO 2012 (abstr 4380)              | B2          |  |
|         |            | lung                                             | exon 20 p.762-823 (GoF)         | response                                     | HSP90 inhibitors                                         | early trials                                    | ASCO 2014 (abstr 8015)              | B2          |  |
|         |            | lung                                             | exon 19 p.729-761 (GoF)         | sensitivity                                  | MEK inhibitors (alone or in combination)                 | preclinical                                     | 23102728                            | B3          |  |
|         |            | lung                                             | exon 19 p.729-761 (GoF)         | sensitivity                                  | MEK inhibitors (alone or in combination)                 | preclinical                                     | 23102728                            | B3          |  |
| MYC     | ampl.      | myeloma neuroblastoma                            | ampl. (GoF) ampl. (GoF)         | sensitivity sensitivity                      | BET inhibitors BET inhibitors                            | preclinical preclinical                         | 21889194 23430699                   | B3 B3       |  |
| EGFR    | 745-750del | lung                                             | exon 20 p.762-823 (GoF)         | sensitivity                                  | osimertinib                                              | preclinical                                     | 26515464                            | B3          |  |
|         |            | lung                                             | ampl.                           | resistance or non-response                   | Osimertinib,Rociletinib                                  | preclinical                                     | 28202511                            | B3          |  |
| ATM     | A749V      | prostate gastric                                 | any (LoF) any (LoF)             | response response                            | PARP inhibitors PARP inhibitors                          | early trials early trials                       | 26510020 ENA 2014 (ab- str 8LBA)    | B2 B2       |  |
|         |            | colorectal                                       | any (LoF)                       | response                                     | ATR inhibitors                                           | case report                                     | ENA 2015 (ab- stract A48)           | B2          |  |
| ABL1    | D233N      | ALL                                              | T315I (GoF)                     | response                                     | AURK inhibitors + BCR- ABL1 inhibitors                   | case report                                     | 22772060                            | B2          |  |
|         |            | ALL                                              | T315I (GoF)                     | response                                     | axitinib                                                 | case report                                     | 25686603                            | B2          |  |
| FOXA1   | ampl.      | colorectal                                       | ampl. (GoF)                     | sensitivity                                  | BCL2 inhibitors                                          | preclinical                                     | 27397505                            | B3          |  |
| CDK6    | ampl.      | unspecified                                      | ampl. (GoF)                     | sensitivity                                  | CDK6 inhibitors                                          | preclinical                                     | 22471707                            | B3          |  |
| MYC     | ampl.      | neuroblastoma                                    | ampl. (GoF)                     | sensitivity                                  | CDK7 inhibitors                                          | preclinical                                     | 25416950                            | B3          |  |
| ATM     | A749V      | bladder anaplast. Large-cell lymph.              | any (LoF) any (LoF)             | response sensitivity                         | cisplatin DNA-PKc inhibitors                             | early trials preclinical                        | 26238431 23761041                   | B2 B3       |  |

| Patient |         | Gene-Drug     |               |             | Associations   |             |          |       |
|---------|---------|---------------|---------------|-------------|----------------|-------------|----------|-------|
| Gene    | Variant | Disease       | Known Variant | Association | Drugs          | Evidence    | PMID     | Level |
| MYC     | ampl.   | neuroblastoma | ampl. (GoF)   | sensitivity | FACT inhibitor | preclinical | 26537256 | B3    |
| ATM     | A749V   |               | mut.          | sensitivity | Olaparib       | preclinical | 20739657 | B3    |
| MYC     | ampl.   | prostate      | ampl. (GoF)   | sensitivity | PIM inhibitors | preclinical | 25505253 | B3    |

**Other genes:** here you can find other genes that might be interesting to check (information from Target DB<sup>3</sup> and Meric-Bernstam list<sup>4</sup>). No level information is provided in this section.

| Patient |         | Drug-Gene Interactions |                           |
|---------|---------|------------------------|---------------------------|
| Gene    | Variant | Known Variant          | Description               |
| NKX2-1  | amp     | Amplification          | Diagnostic in lung cancer |

<sup>3</sup>Van Allen et al., Nat Med (2014), v3

<sup>4</sup>Meric-Bernstam et al., J Natl Cancer Inst (2015)
